# Supplementary material
Source: publisher figshare collection journal article supplement (https://acs.figshare.com/ndownloader/files/4043143)

# Supporting Information

## **Palladium-Catalyzed Arylic/Allylic Aminations: Permutable Domino Sequences for the Synthesis of Dihydroquinolines from Morita-Baylis-Hillman Adducts**

*Mélanie M. Lorion, Danila Gasperini, Julie Oble, Giovanni Poli\**

UPMC Univ. Paris 06, Sorbonne Universités, Institut Parisien de Chimie Moléculaire (UMR CNRS 7201),  
case 183, 4 place Jussieu, 75005 Paris, France.

E-mail:

giovanni.poli@upmc.fr

## **Contents**

|                                                                    |         |
|--------------------------------------------------------------------|---------|
| 1. General Remarks                                                 | S1      |
| 2. General Procedures                                              | S2-S3   |
| 3. Synthesis and Characterization of MBH adducts                   | S3-S7   |
| 4. Synthesis and Characterization of allylic amination products    | S7-S9   |
| 5. Synthesis and Characterization of 1,2-dihydroquinoline products | S9-S15  |
| 6. <sup>1</sup> H and <sup>13</sup> C NMR Spectra                  | S16-S38 |

### **1. General Remarks**

Unless special mention, all reactions were carried out under an argon atmosphere. Glassware was flame-dried under an argon gas flow prior to use. Palladium-mediated reactions were run in sealed tubes with magnetic stirring.

Anhydrous 1,4-dioxane was obtained by distillation over sodium/benzophenone and used freshly distilled.

Other reagents were commercially available and used without further purification, except for aniline which was purified by simple distillation.

TLC were performed on Merck 60 F254 silica gel and revealed with either a ultra-violet lamp ( $\lambda = 254$  nm) or a specific color reagent (potassium permanganate, vanillin...). A silica gel Merck Geduran SI 60 (40-63  $\mu\text{m}$ ) was used for flash column chromatographies (FC). Preparative thin layer chromatographies were realized with PLC silica gel 60 F<sub>254</sub> (1 mm, 20x20 cm).

NMR spectra ( $^1\text{H}$ ,  $^{13}\text{C}$ ,  $^{19}\text{F}$ ) were recorded on a Bruker AM300 MHz or a Bruker AVANCE 400 MHz spectrometer. Chemical shifts are given in parts per million (ppm) using the  $\text{CDCl}_3$  residual chloroform signal as reference ( $\delta^1\text{H} = 7.26$  ppm,  $\delta^{13}\text{C} = 77.0$  ppm). The terms m, s, d, t, and q represent multiplet, singlet, doublet, triplet, and quadruplet respectively. Coupling constants ( $J$ ) are given in Hertz (Hz). IR spectra were recorded with a Tensor 27 (ATR diamond) Bruker spectrometer. IR spectra were reported as characteristic bands ( $\text{cm}^{-1}$ ). High resolution mass spectra (HRMS) were recorded at the Institut Parisien de Chimie Moléculaire (FR 2769) of UPMC (electrospray source).

## 2. General Procedures

**General Procedure 1 (GP1).** *Morita-Baylis-Hillman reaction.* A solution of aldehyde (10 mmol, 1 equiv), acrylate (15 mmol, 1.5 equiv) and DABCO (10 mmol, 1 equiv) in MeOH (5 mL) was stirred at room temperature. After completion of the reaction, monitored by TLC, the reaction mixture was hydrolyzed with aqueous saturated  $\text{NH}_4\text{Cl}$  solution and extracted with EtOAc. The combined organic layers were dried over anhydrous  $\text{MgSO}_4$  and evaporated. The residue was purified by column chromatography (Cyclohexane:EtOAc, 8:2) on silica gel to afford the desired product.

**General Procedure 2 (GP2).** *Allylic Amination reaction.* Under argon atmosphere,  $[\text{PdCl}(\eta^3\text{-C}_3\text{H}_5)]_2$  (5 mol %) and XANTPhos (10 mol %) were stirred at room temperature for 15 minutes in 1,4-dioxane (0.4 M). A solution of MBH adducts (1 equiv) in 1,4-dioxane (0.4 M) and the aromatic amine (1.5 equiv) was added. The reaction mixture was stirred at 80 °C. After completion, the reaction was cooled down to room temperature, diluted with EtOAc and filtered through a plug of Celite.<sup>®</sup> The crude product was purified by preparative thin layer chromatography PLC (pentane:EtOAc, 8:2), to afford the desired allylamine.

**General Procedure 3 (GP3).** *Pd-catalyzed pseudo-domino reaction.* Under argon atmosphere,  $[\text{PdCl}(\eta^3\text{-C}_3\text{H}_5)]_2$  (5 mol %), XANTPhos (10 mol %) and  $\text{K}_2\text{CO}_3$  (2 equiv) were stirred at room temperature for 15 minutes in 1,4-dioxane (0.4 M). A solution of MBH adducts (1 equiv) in 1,4-dioxane (0.4 M) and the aromatic amine (1.5 equiv) was added. The reaction mixture was stirred at 80 °C during 20 hours, unless otherwise noted. After completion, the reaction was cooled down to room temperature, diluted with EtOAc and filtered through a plug of Celite.<sup>®</sup> The crude product was

purified by preparative thin layer chromatography PLC (pentane:EtOAc, 8:2), to afford the corresponding 1,2-dihydroquinoline.

### 3. Synthesis and Characterization of MBH adducts

#### Methyl 2-(hydroxy(phenyl)methyl)acrylate (**1a**)

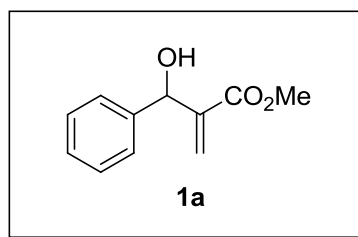

Following GP1 during 3 days with benzaldehyde and methylacrylate to give 1.64 g (85%) of **1a** as a colorless oil. The spectroscopic data are in accordance with those reported in the literature.<sup>1</sup> **<sup>1</sup>H NMR (400 MHz, CDCl<sub>3</sub>)**  $\delta$  (ppm) 7.39-7.26 (m, 5H), 6.34 (s, 1H), 5.83 (s, 1H), 5.57 (d,  $J$  = 5.5 Hz, 1H), 3.73 (s, 3H), 2.98 (d,  $J$  = 5.5 Hz, 1H). **<sup>13</sup>C NMR (75 MHz, CDCl<sub>3</sub>)**  $\delta$  (ppm) 166.8, 142.1, 141.4, 128.4, 127.8, 126.7, 125.9, 73.0, 51.9. **FTIR (cm<sup>-1</sup>)**  $\nu$  3465, 3032, 2953, 1720, 1440.

#### Methyl 2-((2-chlorophenyl)(hydroxy)methyl)acrylate (**1b**)

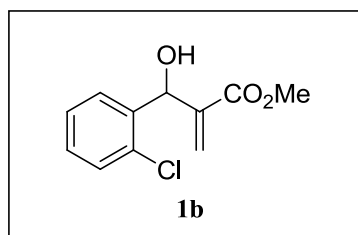

Following GP1 during 3 days, with 2-chlorobenzaldehyde and methylacrylate to give 1.83 g (81%) of **1b** as a colorless oil. The spectroscopic data are in accordance with those reported in the literature.<sup>2</sup> **<sup>1</sup>H NMR (300 MHz, CDCl<sub>3</sub>)**  $\delta$  (ppm) 7.55 (d,  $J$  = 7.6 Hz, 1H), 7.37-7.24 (m, 3H), 6.34 (s, 1H), 5.99 (d,  $J$  = 4.8 Hz, 1H), 5.62 (s, 1H), 3.76 (s, 3H), 3.64 (d,  $J$  = 4.9 Hz, 1H). **<sup>13</sup>C NMR (75 MHz, CDCl<sub>3</sub>)**  $\delta$

<sup>1</sup> Holz, J.; Schäffner, B.; Zayas, O.; Spannenberg, A.; Börner, A. *Adv. Synth. Catal.* **2008**, 350, 2533.

<sup>2</sup> Zhu, B.; Yan, L.; Pan, Y.; Lee, R.; Liu, H.; Han, Z.; Huang, K.-W.; Tan, C.-H.; Jiang, Z. *J. Org. Chem.* **2011**, 76, 6894.

(ppm) 166.8, 140.6, 138.2, 132.7, 129.3, 128.8, 128.0, 126.9, 126.8, 69.0, 52.2. **FTIR** (cm<sup>-1</sup>)  $\nu$  3438, 2998, 2953, 1722, 1440.

**Methyl 2-((2-bromophenyl)(hydroxy)methyl)acrylate (1c)**

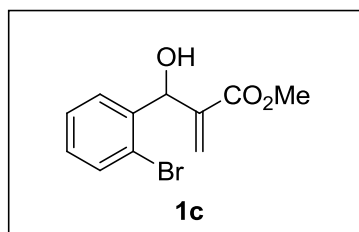

Following GP1 during 48 hours with 2-bromobenzaldehyde and methylacrylate to give 2.67 g (98%) of **1c** as a colorless oil. The spectroscopic data are in accordance with those reported in the literature.<sup>3</sup> **<sup>1</sup>H NMR (300 MHz, CDCl<sub>3</sub>)**  $\delta$  (ppm) 7.51 (d,  $J$  = 7.6 Hz, 2H), 7.30 (t,  $J$  = 7.6 Hz, 1H), 7.16-7.10 (m, 1H), 6.31 (s, 1H), 5.92 (d,  $J$  = 4.3 Hz, 1H), 5.56 (s, 1H), 3.73 (s, 3H), 3.57 (d,  $J$  = 3.7 Hz, 1H). **<sup>13</sup>C NMR (75 MHz, CDCl<sub>3</sub>)**  $\delta$  (ppm) 167.0, 140.5, 139.7, 132.7, 129.3, 128.4, 127.7, 127.2, 123.1, 71.5, 52.2. **FTIR** (cm<sup>-1</sup>)  $\nu$  3413, 2999, 1709, 1437, 1266.

**Methyl 2-((2-bromophenyl)(hydroxy)methyl)acrylate (1c')**

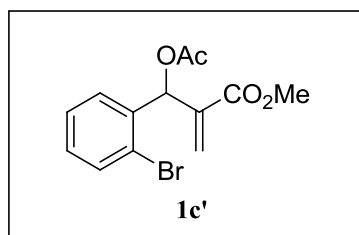

Under argon atmosphere, DMAP (16 mg, 0.13 mmol, 10 mol %) and acetic anhydride (153 mg, 1.5 mmol, 1.2 equiv) were stirred at room temperature for 5 minutes in 4 mL of DCM. The mixture was cooled to 0 °C and a solution of **1c** (330 mg, 1.22 mmol, 1 equiv) in 2.2 mL of DCM was added, followed by NEt<sub>3</sub> (192 mg, 1.9 mmol, 1.5 equiv). The reaction mixture was stirred at room temperature. After completion of the reaction (TLC monitoring), the reaction mixture was treated with H<sub>2</sub>O and extracted with DCM. The combined organic layers were dried over anhydrous MgSO<sub>4</sub>

<sup>3</sup> Coelho, F.; Almeida, W. P.; Veronese, D.; Mateus, C. R.; Lopes, E. C. S.; Rossi, R. C.; Silveira G. P. C.; Pavam, C. H. *Tetrahedron* **2002**, 58, 7437.

and filtered through a plug of silica (Cyclohexane:EtOAc, 6:4) to give 210 mg (55%) of **1c'** as a colorless oil. The spectroscopic data are in accordance with those reported in the literature.<sup>4</sup> **<sup>1</sup>H NMR (300 MHz, CDCl<sub>3</sub>)**  $\delta$  (ppm) 7.50 (d,  $J$  = 8.0 Hz, 1H), 7.29-7.24 (m, 2H), 7.12 (d,  $J$  = 9.1 Hz, 1H), 6.92 (s, 1H), 6.40 (s, 1H), 5.54 (s, 1H), 3.67 (s, 1H), 2.04 (s, 3H). **<sup>13</sup>C NMR (101 MHz, CDCl<sub>3</sub>)**  $\delta$  (ppm) 168.8, 165.1, 138.0, 136.7, 132.9, 129.7, 128.3, 127.8, 127.3, 123.5, 51.9, 21.9, 20.6.

**Ethyl 2-((2-bromophenyl)(hydroxy)methyl)acrylate (1d)**

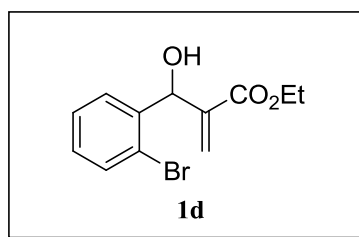

Following GP1 during 2 days with 2-bromobenzaldehyde and ethyl acrylate in EtOH to give 2.17 g (76%) of **1d** as a colorless oil. The spectroscopic data are in accordance with those reported in the literature.<sup>5</sup> **<sup>1</sup>H NMR (400 MHz, CDCl<sub>3</sub>)**  $\delta$  (ppm) 7.53-7.50 (m, 2H), 7.31 (td,  $J$  = 7.7, 0.9 Hz, 1H), 7.14 (td,  $J$  = 7.7, 1.7 Hz, 1H), 6.33 (s, 1H), 5.93 (s, 1H), 5.58 (s, 1H), 4.19 (qd,  $J$  = 7.1, 1.8 Hz, 2H), 3.46 (d,  $J$  = 3.3 Hz, 1H), 1.25 (t,  $J$  = 7.1, 3H). **<sup>13</sup>C NMR (101 MHz, CDCl<sub>3</sub>)**  $\delta$  (ppm) 166.4, 140.9, 140.0, 132.7, 129.2, 128.3, 127.5, 126.6, 123.1, 71.3, 61.0, 14.0. **FTIR (cm<sup>-1</sup>)**  $\nu$  3413, 3062, 2980, 2952, 1702, 1439.

***tert*-Butyl 2-((2-bromophenyl)(hydroxy)methyl)acrylate (1e)**

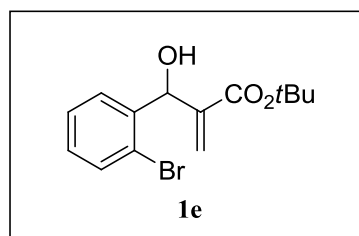

<sup>4</sup> Cao, H.; Vieira, T. O.; Alper, H. *Org. Lett.* **2011**, *13*, 11.

<sup>5</sup> Coelho, F.; Veronese, D.; Pavam, C. H.; de Paula, V. I.; Buffon, R. *Tetrahedron* **2006**, *62*, 4563.

Following GP1 during 4 days with 2-bromobenzaldehyde and *tert*-butyl acrylate to give 2,53 g (81%) of **1e** as a colorless oil. The spectroscopic data are in accordance with those reported in the literature.<sup>6</sup> **<sup>1</sup>H NMR (300 MHz, CDCl<sub>3</sub>)**  $\delta$  (ppm) 7.55 (dd,  $J$  = 7.8, 1.2 Hz, 1H), 7.50 (dd,  $J$  = 7.7, 1.7 Hz, 1H), 7.33 (td,  $J$  = 7.6, 1.2 Hz, 1H), 7.16 (td,  $J$  = 7.7, 1.7 Hz, 1H), 6.27 (s, 1H), 5.90 (d,  $J$  = 4.0 Hz, 1H), 5.55 (s, 1H), 3.24 (d,  $J$  = 4.4 Hz, 1H), 1.43 (s, 9H). **<sup>13</sup>C NMR (101 MHz, CDCl<sub>3</sub>)**  $\delta$  (ppm) 165.7, 142.2, 140.3, 132.7, 129.2, 128.3, 127.6, 125.8, 123.3, 81.7, 71.7, 28.0. **FTIR (cm<sup>-1</sup>)**  $\nu$  3419, 2976, 2930, 1707, 1631, 1469, 1438, 1367, 1282, 1145.

#### Methyl 2-((3-bromonaphthalen-2-yl)(hydroxy)methyl)acrylate (**1f**)

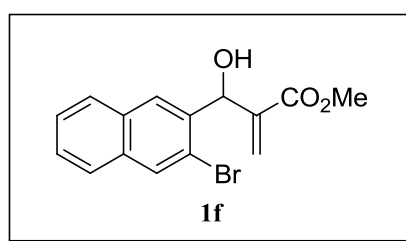

Following GP1 during 3 days with 2-bromo-2-naphthaldehyde (517 mg, 2,20 mmol) and methyl acrylate to give 739 mg (96%) of **1f** as a colorless oil. **<sup>1</sup>H NMR (400 MHz, CDCl<sub>3</sub>)**  $\delta$  (ppm) 8.33 (d,  $J$  = 8.5 Hz, 1H), 7.83-7.81 (m, 2H), 7.66 (d,  $J$  = 8.5 Hz, 1H), 7.60-7.57 (m, 1H), 7.54-7.52 (m, 1H), 6.36 (s, 1H), 6.28 (s, 1H), 5.59 (s, 1H), 3.77 (s, 3H). **<sup>13</sup>C NMR (101 MHz, CDCl<sub>3</sub>)**  $\delta$  (ppm) 166.9, 140.7, 137.7, 134.1, 132.1, 128.1, 127.9, 127.4, 127.4, 127.1, 126.7, 125.0, 123.2, 72.26, 52.07. **FTIR (cm<sup>-1</sup>)**  $\nu$  3458, 3057, 1721, 1630, 1501, 1438, 1328, 1258, 1149.

#### 2-((2-bromophenyl)(hydroxy)methyl)acrylonitrile (**1g**)

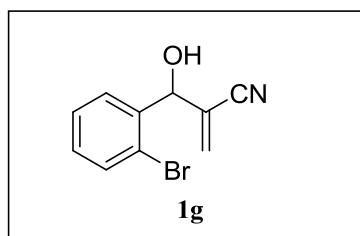

Following GP1 during 3 days with 2-bromobenzaldehyde and acrylonitrile to give 2,24 g (94%) of **1g** as a colorless oil. The spectroscopic data are in accordance with those reported in the literature.<sup>3</sup> **<sup>1</sup>H**

<sup>6</sup> Furukawa, T.; Nishimine, T.; Tokunaga, E.; Hasegawa, K.; Shiro, M.; Shibata, M. *Org. Lett.* **2011**, *13*, 3972.

**NMR (300 MHz, CDCl<sub>3</sub>)**  $\delta$  (ppm) 7.60-7.53 (m, 2H), 7.38 (td,  $J$  = 7.6, 1.2 Hz, 1H), 7.27-7.15 (ddd,  $J$  = 7.8, 7.5, 1.7 Hz, 1H), 6.06-6.01 (m, 2H), 5.69 (s, 1H). **<sup>13</sup>C NMR (75 MHz, CDCl<sub>3</sub>)**  $\delta$  (ppm) 138.1, 133.1, 131.7, 130.3, 128.3, 128.2, 124.6, 122.8, 116.8, 72.6. **FTIR** (cm<sup>-1</sup>)  $\nu$  3419, 3066, 2922, 2229, 1928, 1590, 1439.

#### 4. Synthesis and Characterization of allylic amination products

##### (*E*)-methyl 3-phenyl-2-((phenylamino)methyl)acrylate (**2a**)

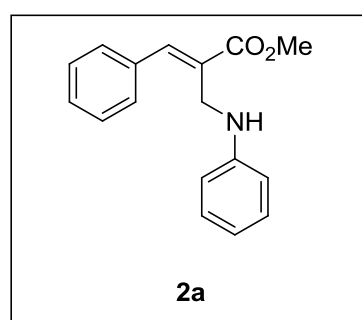

Following GP2 with **1a** (100 mg, 0.52 mmol) and aniline (73 mg, 0.78 mmol) to give 137 mg (98%) of **2a** as a yellow oil. The spectroscopic data were consistent with those reported in the literature.<sup>7</sup> **<sup>1</sup>H NMR (300 MHz, CDCl<sub>3</sub>)**  $\delta$  (ppm) 7.90 (s, 1H), 7.50-7.36 (m, 5H), 7.15 (t,  $J$  = 7.2 Hz, 2H), 6.73 (t,  $J$  = 7.3 Hz, 1H), 6.54 (d,  $J$  = 7.7 Hz, 2H), 4.18-4.11 (m, 3H), 3.84 (s, 3H). **<sup>13</sup>C NMR (75 MHz, CDCl<sub>3</sub>)**  $\delta$  (ppm) 168.2, 147.7, 142.9, 134.8, 129.5, 129.2, 129.1, 128.8, 128.7, 117.8, 113.4, 52.2, 40.9. **FTIR** (cm<sup>-1</sup>)  $\nu$  3388, 3023, 2949, 1712, 1600, 1503, 1432, 1201, 1103. **HRMS (ESI)** calcd for C<sub>17</sub>H<sub>18</sub>NO<sub>2</sub> ([M+H]<sup>+</sup>): 268.1332; found 268.1332.

##### (*E*)-methyl 3-(2-chlorophenyl)-2-((phenylamino)methyl)acrylate (**2b**)

<sup>7</sup> Paira, M.; Mandal, S. K.; Roy, S. C. *Tetrahedron Lett.* **2008**, 49, 2432.

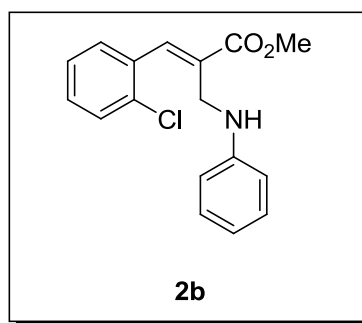

Following GP2 during 2 days with **1b** (371 mg, 1.64 mmol) and aniline (230 mg, 2.46 mmol) to give 455 mg (91%) of **2b** as a yellow oil. **<sup>1</sup>H NMR (300 MHz, CDCl<sub>3</sub>)**  $\delta$  (ppm) 7.92 (s, 1H), 7.46-7.38 (m, 2H), 7.33-7.20 (m, 2H), 7.13-7.04 (m, 2H), 6.68 (t,  $J = 7.3$  Hz, 1H), 6.44 (d,  $J = 7.7$  Hz, 2H), 4.16-4.05 (m, 1H), 4.02 (s, 2H), 3.82 (s, 3H). **<sup>13</sup>C NMR (101 MHz, CDCl<sub>3</sub>)**  $\delta$  (ppm) 168.2, 147.7, 142.9, 134.8, 129.5, 129.2, 129.1, 128.7, 128.7, 117.8, 113.4, 52.2, 41.0. **FTIR (cm<sup>-1</sup>)**  $\nu$  3392, 3053, 2950, 1707, 1601, 1503, 1469, 1434, 1229, 1103. **HRMS (ESI)** calcd for C<sub>17</sub>H<sub>16</sub>ClNO<sub>2</sub>Na ([M+Na]<sup>+</sup>): 324.0762; found 324.0764.

**(E)-methyl 3-(2-bromophenyl)-2-((phenylamino)methyl)acrylate (2c)**

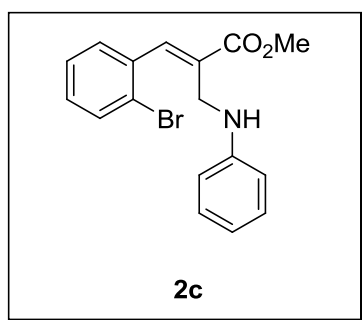

Following GP2 with **1c** (100 mg, 0.32 mmol) and aniline (45 mg, 0.48 mmol) to give 65 mg (56%) of **2c** as a yellow oil. The spectroscopic data were consistent with those reported in the literature.<sup>8</sup> **<sup>1</sup>H NMR (300 MHz, CDCl<sub>3</sub>)**  $\delta$  (ppm) 7.88 (s, 1H), 7.66 (dd,  $J = 7.9, 1.3$  Hz, 1H), 7.66 (dd,  $J = 7.6, 1.8$  Hz, 1H), 7.33 (td,  $J = 7.5, 1.2$  Hz, 1H), 7.28-7.21 (m, 1H), 7.16-7.08 (m, 2H), 6.71 (td,  $J = 7.3, 1.8$  Hz, 1H), 6.49-6.43 (m, 2H), 4.04 (s, 2H), 3.86 (s, 3H). **<sup>13</sup>C NMR (75 MHz, CDCl<sub>3</sub>)**  $\delta$  (ppm) 167.8, 147.5, 141.6, 135.1, 132.8, 130.9, 130.6, 129.1, 127.4, 124.1, 117.9, 113.5, 52.3, 41.1. **FTIR (cm<sup>-1</sup>)**.  $\nu$  2955, 2825, 1796, 1564, 1278, 715, 667.

<sup>8</sup> Wang, Y.; Liu, L.; Wang, D.; Chen, Y-J.; *Org. Biomol. Chem.*, **2012**, *10*, 6908.



## 5. Synthesis and Characterization of 1,2-dihydroquinoline products

### Methyl 1-phenyl-1,2-dihydroquinoline-3-carboxylate (**3a**)

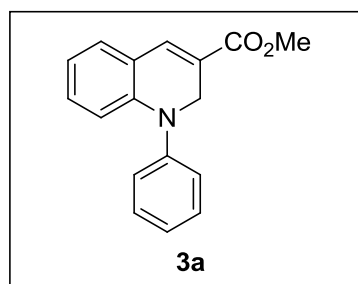

Following GP3 with **1c** (220 mg, 0.80 mmol) and aniline (112 mg, 1.2 mmol) to give 123 mg (58%) of **3a** as a yellow oil. **<sup>1</sup>H NMR (400 MHz, CDCl<sub>3</sub>)**  $\delta$  (ppm) 7.48 (s, 1H), 7.41-7.37 (m, 2H), 7.29-7.26 (m, 2H), 7.18-7.12 (m, 2H), 7.07-7.03 (m, 1H), 6.73 (t,  $J$  = 7.9 Hz, 2H), 4.62 (s, 2H), 3.80 (s, 3H). **<sup>13</sup>C NMR (101 MHz, CDCl<sub>3</sub>)**  $\delta$  (ppm) 165.7, 145.4, 140.4, 135.3, 131.1, 129.6, 129.4, 124.5, 123.7, 122.4, 122.1, 119.1, 114.8, 51.8, 48.9. **FTIR (cm<sup>-1</sup>)**  $\nu$  3028, 2949, 1702, 1485, 1201. **HRMS (ESI)** calcd for C<sub>17</sub>H<sub>15</sub>NO<sub>2</sub>Na ([M+Na]<sup>+</sup>): 288.0995; found 288.0984.

### Methyl 1-*p*-tolyl-1,2-dihydroquinoline-3-carboxylate (**3b**)

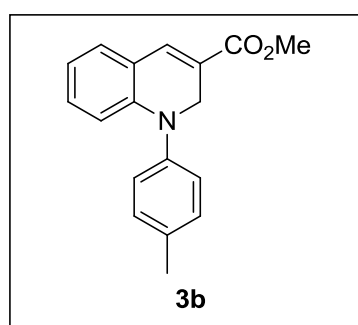

Following GP3 with **1c** (184 mg, 0.68 mmol) and *p*-toluidine (139 mg, 1.3 mmol) to give 114 mg (60%) of **3b** as a yellow oil. **<sup>1</sup>H NMR (400 MHz, CDCl<sub>3</sub>)**  $\delta$  (ppm) 7.46 (s, 1H), 7.20 (d,  $J$  = 8.5 Hz, 2H), 7.17 (d,  $J$  = 8.5 Hz, 2H), 7.10 (d,  $J$  = 7.6 Hz, 1H), 7.02 (t,  $J$  = 7.8 Hz, 1H), 6.69 (t,  $J$  = 7.4 Hz, 1H), 6.62 (d,  $J$  = 8.3 Hz, 1H), 4.61 (s, 2H), 3.80 (s, 3H), 2.37 (s, 3H). **<sup>13</sup>C NMR (101 MHz, CDCl<sub>3</sub>)**  $\delta$  (ppm) 165.8, 145.9, 142.9, 135.3, 134.5, 131.1, 130.1, 131.1, 130.1, 129.6, 124.1, 122.0, 121.8, 118.6,

114.4, 51.5, 49.1, 20.9. **FTIR** ( $\text{cm}^{-1}$ )  $\nu$  3028, 2949, 1703, 1510, 1486, 1158. **HRMS (ESI)** calcd for  $\text{C}_{18}\text{H}_{17}\text{NO}_2\text{Na}$  ( $[\text{M}+\text{Na}]^+$ ): 302.1151; found 302.1150.

**Methyl 1-*o*-tolyl-1,2-dihydroquinoline-3-carboxylate (3c)**

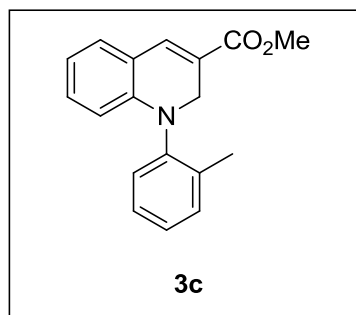

Following GP3 with **1c** (162 mg, 0.60 mmol) and *o*-toluidine (96 mg, 0.90 mmol) to give 82 mg (50 %) of **3c** as a yellow oil.  **$^1\text{H}$  NMR (300 MHz,  $\text{CDCl}_3$ )**  $\delta$  (ppm) 7.48 (s, 1H), 7.36-7.27 (m, 4H), 7.09 (d,  $J = 7.4$  Hz, 1H), 6.99 (m, 1H), 6.63 (t,  $J = 7.4$  Hz, 1H), 5.98 (d,  $J = 8.2$  Hz, 1H), 4.64 (d,  $J = 18.9$  Hz, 2H), 3.82 (s, 3H), 2.21 (s, 3H).  **$^{13}\text{C}$  NMR (101 MHz,  $\text{CDCl}_3$ )**  $\delta$  (ppm) 165.8, 146.0, 143.4, 136.0, 135.8, 131.6, 129.7, 127.7, 127.4, 127.0, 120.9, 120.2, 117.5, 112.5, 51.7, 49.8, 17.8. **FTIR** ( $\text{cm}^{-1}$ )  $\nu$  3402, 3068, 2999, 2952, 1708, 1438. **HRMS (ESI)** calcd for  $\text{C}_{18}\text{H}_{17}\text{NO}_2\text{Na}$  ( $[\text{M}+\text{Na}]^+$ ): 302.1151; found 302.1161.

**Methyl 1-mesityl-1,2-dihydroquinoline-3-carboxylate (3d)**

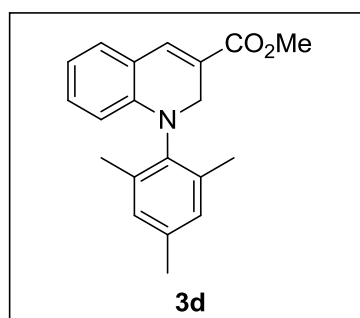

Following GP3 with **1c** (200 mg, 0.74 mmol) and 2,4,6-trimethylaniline (150 mg, 1.11 mmol) to give 46 mg (20 %) of **3d** as a yellow oil.  **$^1\text{H}$  NMR (400 MHz,  $\text{CDCl}_3$ )**  $\delta$  (ppm) 7.41 (s, 1H), 7.01-6.98 (m, 3H), 6.92-6.89 (m, 1H), 6.50 (t,  $J = 7.4$  Hz, 1H), 5.81 (d,  $J = 8.2$  Hz, 1H), 4.57 (s, 2H), 3.78 (s, 3H), 2.32 (s, 3H), 2.18 (s, 6H).  **$^{13}\text{C}$  NMR (101 MHz,  $\text{CDCl}_3$ )**  $\delta$  (ppm) 165.9, 145.5, 138.4, 137.2, 137.1, 136.0, 132.2, 130.0, 119.5, 118.1, 116.4, 110.7, 51.7, 49.0, 29.7, 21.0, 17.9. **FTIR** ( $\text{cm}^{-1}$ )  $\nu$  3068,

2952, 2367, 1703, 1491, 1233. **HRMS (ESI)** calcd for  $C_{20}H_{21}NO_2Na$  ( $[M+Na]^+$ ): 330.1465; found 330.1455.

**Methyl 1-(naphthalen-1-yl)-1,2-dihydroquinoline-3-carboxylate (3e)**

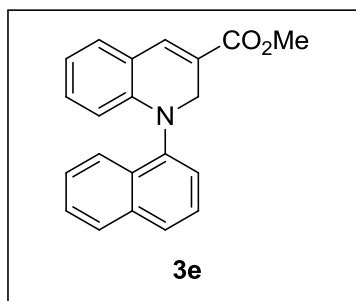

Following GP3 during 40 hours with **1c** (264 mg, 0.97 mmol) and 1-naphtylamine (197 mg, 1.38 mmol) to give 76 mg (25 %) of **3e** as a yellow oil.  **$^1H$  NMR (400 MHz,  $CDCl_3$ )**  $\delta$  (ppm) 7.99 (d,  $J$  = 8.4 Hz, 1H), 7.94 (d,  $J$  = 8.4 Hz, 1H), 7.86 (d,  $J$  = 7.9 Hz, 1H), 7.59-7.53 (m, 4H), 7.51-7.45 (m, 1H), 7.15 (d,  $J$  = 7.3 Hz, 1H), 6.88 (t,  $J$  = 7.5 Hz, 1H), 6.65 (t,  $J$  = 7.3 Hz, 1H), 5.94 (d,  $J$  = 8.2 Hz, 1H), 4.84 (d,  $J$  = 14.6 Hz, 1H), 4.76 (d,  $J$  = 14.6 Hz, 1H), 3.81 (s, 3H).  **$^{13}C$  NMR (101 MHz,  $CDCl_3$ )**  $\delta$  (ppm) 165.8, 146.9, 141.7, 135.8, 135.1, 131.5, 129.9, 129.6, 128.5, 127.3, 126.5, 126.4, 126.3, 124.8, 123.4, 121.4, 120.3, 117.8, 113.5, 51.7, 50.7. **FTIR** ( $cm^{-1}$ )  $\nu$  2949, 2851, 1700, 1486, 1197. **HRMS (ESI)** calcd for  $C_{21}H_{17}NO_2Na$  ( $[M+Na]^+$ ): 338.1151; found 338.1153.

**Methyl 1-(4-methoxyphenyl)-1,2-dihydroquinoline-3-carboxylate (3f)**

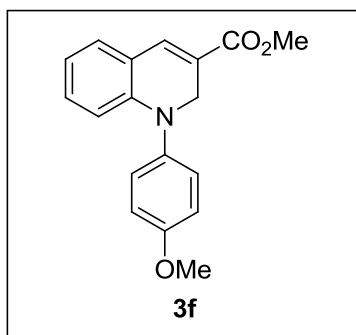

Following GP3 with **1c** (228 mg, 0.84 mmol) and *p*-anisidine (155 mg, 1.26 mmol) to give 140 mg (56%) of **3f** as a yellow oil.  **$^1H$  NMR (400 MHz,  $CDCl_3$ )**  $\delta$  (ppm) 7.45 (s, 1H), 7.21 (d,  $J$  = 8.9 Hz, 2H), 7.08 (dd,  $J$  = 1.4, 7.5 Hz, 1H), 7.02-7.00 (m, 1H), 6.95 (d,  $J$  = 8.9 Hz, 2H), 6.66 (t,  $J$  = 7.4 Hz, 1H), 6.46 (d,  $J$  = 8.3 Hz, 1H) 4.60 (s, 2H), 3.83 (s, 3H), 3.80 (s, 3H).  **$^{13}C$  NMR (101 MHz,  $CDCl_3$ )**  $\delta$

(ppm) 165.7, 157.1, 146.5, 138.4, 135.4, 131.3, 129.6, 129.0, 126.3, 121.3, 118.1, 115.1, 114.9, 114.8, 113.6, 55.5, 51.7, 49.8. **FTIR** ( $\text{cm}^{-1}$ )  $\nu$  2950, 2836, 1700, 1509, 1220. **HRMS (ESI)** calcd for  $\text{C}_{18}\text{H}_{17}\text{NO}_3\text{Na}$  ( $[\text{M}+\text{Na}]^+$ ): 318.1101; found 318.1093.

**Methyl 1-(4-chlorophenyl)-1,2-dihydroquinoline-3-carboxylate (3g)**

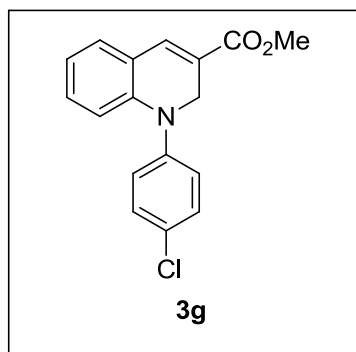

Following GP3 with **1c** (119 mg, 0.44 mmol) and *p*-chloroaniline (84.2 mg, 0.66 mmol) to give 93 mg (70%) of **3g** as a yellow oil.  **$^1\text{H}$  NMR (400 MHz,  $\text{CDCl}_3$ )**  $\delta$  (ppm) 7.47 (s, 1H), 7.34 (d,  $J = 8.8$  Hz, 2H), 7.20 (d,  $J = 8.8$  Hz, 2H), 7.14 (d,  $J = 7.5$  Hz, 1H), 7.06 (t,  $J = 8.6$  Hz, 1H), 6.78-6.71 (m, 2H), 4.57 (s, 2H), 3.80 (s, 3H).  **$^{13}\text{C}$  NMR (101 MHz,  $\text{CDCl}_3$ )**  $\delta$  (ppm) 165.6, 144.7, 144.1, 135.1, 131.1, 129.6, 129.4, 129.2, 124.7, 122.7, 122.3, 119.6, 114.9, 51.9, 48.8. **FTIR** ( $\text{cm}^{-1}$ )  $\nu$  2950, 2850, 1703, 1491, 1225. **HRMS (ESI)** calcd for  $\text{C}_{17}\text{H}_{14}\text{ClNO}_2\text{Na}$  ( $[\text{M}+\text{Na}]^+$ ): 322.0605; found 322.0602.

**Methyl 1-(4-nitrophenyl)-1,2-dihydroquinoline-3-carboxylate (3h)**

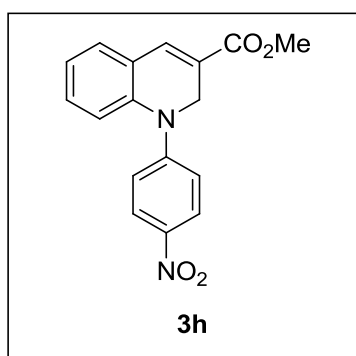

Following GP3 with **1c** (122 mg, 0.45 mmol) and *p*-nitroaniline (93.5 mg, 0.68 mmol) to give 78 mg (56 %) of **3h** as a yellow oil.  **$^1\text{H}$  NMR (300 MHz,  $\text{CDCl}_3$ )**  $\delta$  (ppm) 8.19 (d,  $J = 9.3$  Hz, 2H), 7.53 (m, 1H), 7.30-7.14 (m, 5H), 6.99 (td,  $J = 7.4, 1.6$  Hz, 1H), 4.63 (s, 2H), 3.83 (s, 3H).  **$^{13}\text{C}$  NMR (75 MHz,  $\text{CDCl}_3$ )**  $\delta$  (ppm) 165.6, 151.8, 141.3, 134.7, 131.3, 130.0, 125.2, 124.4, 123.0, 120.1, 118.6, 52.4,

47.3. **FTIR** ( $\text{cm}^{-1}$ )  $\nu$  2918, 2850, 1706, 1590, 1500, 1325, 1225. **HRMS (ESI)** calcd for  $\text{C}_{17}\text{H}_{14}\text{N}_2\text{O}_4\text{Na}$  ( $[\text{M}+\text{Na}]^+$ ): 333.0846; found 333.0852.

**Methyl 1-(4-(trifluoromethyl)phenyl)-1,2-dihydroquinoline-3-carboxylate (3i)**

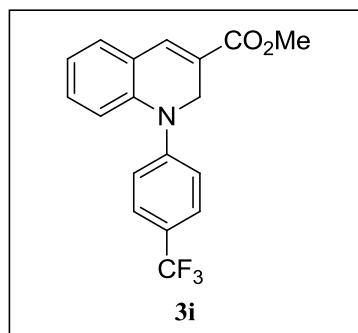

Following GP3 with **1c** (144 mg, 0.5 mmol) and *p*-(trifluoromethyl)aniline (120 mg, 0.75 mmol) to give 86 mg (51%) of **3i** as a yellow oil.  **$^1\text{H}$  NMR (400 MHz,  $\text{CDCl}_3$ )**  $\delta$  (ppm) 7.5 (d,  $J = 8.5$  Hz, 2H), 7.51 (s, 1H), 7.33 (d,  $J = 8.5$  Hz, 2H), 7.20 (dd,  $J = 7.5, 1.5$  Hz, 1H), 7.15-7.10 (m, 1H), 6.97 (d,  $J = 8.3$  Hz, 1H), 6.87 (td,  $J = 7.5, 1.1$  Hz, 1H) 4.61 (s, 2H), 3.82 (s, 3H).  **$^{13}\text{C}$  NMR (101 MHz,  $\text{CDCl}_3$ )**  $\delta$  (ppm) 165.4, 148.8, 143.3, 134.8, 130.9, 129.6, 126.4 (q,  $J_{\text{C-F}} = 3.6$  Hz), 124.9 (q,  $J_{\text{C-F}} = 33.9$  Hz), 124.2 (q,  $J_{\text{C-F}} = 271.8$  Hz), 123.9, 123.2, 121.8, 120.9, 116.2, 51.9, 48.2.  **$^{19}\text{F}$  NMR (380 MHz,  $\text{CDCl}_3$ )**  $\delta$  (ppm) 61.95. **FTIR** ( $\text{cm}^{-1}$ )  $\nu$  2953, 1703, 1598, 1486, 1226. **HRMS (ESI)** calcd for  $\text{C}_{18}\text{H}_{14}\text{F}_3\text{NO}_2\text{Na}$  ( $[\text{M}+\text{Na}]^+$ ): 356.0869; found 356.0872.

**Methyl 1-(4-benzoylphenyl)-1,2-dihydroquinoline-3-carboxylate (3j)**

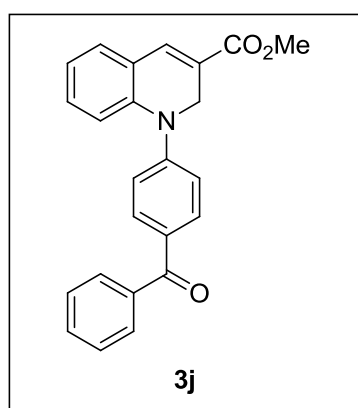

Following GP3 with **1c** (165 mg, 0.61 mmol) and (4-aminophenyl)(phenyl)methanone (183 mg, 0.68 mmol) to give 120 mg (53 %) of **3j** as a yellow oil.  **$^1\text{H}$  NMR (400 MHz,  $\text{CDCl}_3$ )**  $\delta$  (ppm) 7.84 (d,  $J = 8.7$  Hz, 2H), 7.79 (d,  $J = 7.0$  Hz, 2H), 7.58 (t,  $J = 7.4$  Hz, 1H), 7.52-7.47 (m, 3H), 7.31 (d,  $J = 8.7$  Hz,

2H), 7.21 (d,  $J = 8.7$  Hz, 1H), 7.22-7.11 (m, 2H), 6.90 (t,  $J = 7.9$  Hz, 1H), 4.65 (s, 2H), 3.82 (s, 3H).  **$^{13}\text{C}$  NMR (101 MHz,  $\text{CDCl}_3$ )**  $\delta$  (ppm) 195.3, 165.4, 149.7, 142.8, 138.1, 134.8, 132.0, 131.8, 131.5, 130.8, 129.8, 129.5, 128.2, 124.2, 123.5, 121.3, 120.5, 117.0, 115.0, 52.0, 48.0. **FTIR** ( $\text{cm}^{-1}$ )  $\nu$  2950, 2850, 1704, 1650, 1508, 1280. **HRMS (ESI)** calcd for  $\text{C}_{24}\text{H}_{19}\text{NO}_3\text{Na}$  ( $[\text{M}+\text{Na}]^+$ ): 392.1257; found 392.1271.

**Ethyl 1-phenyl-1,2-dihydroquinoline-3-carboxylate (3k)**

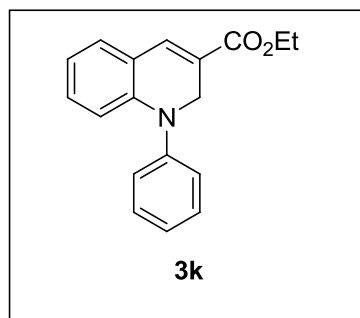

Following GP3 with **1d** (125 mg, 0.44 mmol) and aniline (62 mg, 0.66 mmol) to give 70 mg (57 %) of **3k** as a yellow oil.  **$^1\text{H}$  NMR (400 MHz,  $\text{CDCl}_3$ )**  $\delta$  (ppm) 7.48 (s, 1H), 7.39 (m, 2H), 7.28 (dd,  $J = 8.6$ , 1.1 Hz, 2H), 7.18-7.13 (m, 2H), 7.06-7.02 (m, 1H), 6.75-6.71 (m, 2H), 4.62 (s, 2H), 4.27 (q,  $J = 7.1$  Hz, 2H), 1.34 (t,  $J = 7.1$  Hz, 3H).  **$^{13}\text{C}$  NMR (101 MHz,  $\text{CDCl}_3$ )**  $\delta$  (ppm) 165.2, 145.5, 145.3, 134.9, 130.9, 129.4, 129.3, 124.3, 123.7, 122.5, 122.4, 119.0, 114.7, 60.6, 48.9, 14.3. **FTIR** ( $\text{cm}^{-1}$ )  $\nu$  2980, 1697, 1485, 1261. **HRMS (ESI)** calcd for  $\text{C}_{18}\text{H}_{17}\text{NO}_2\text{Na}$  ( $[\text{M}+\text{Na}]^+$ ): 302.1151; found 302.1155.

***Tert*-butyl 1-phenyl-1,2-dihydroquinoline-3-carboxylate (3l)**

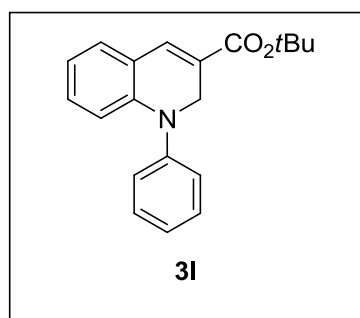

Following GP3 with **1e** (238 mg, 0.76 mmol) and aniline (106 mg, 1.14 mmol) to give 103 mg (45 %) of **3l** as a yellow oil.  **$^1\text{H}$  NMR (400 MHz,  $\text{CDCl}_3$ )**  $\delta$  (ppm) 7.40-7.36 (m, 3H), 7.29-7.26 (m, 2H), 7.17-7.11 (m, 2H), 7.03 (t,  $J = 7.8$  Hz, 1H), 6.74-6.71 (m, 2H), 4.57 (s, 2H), 1.53 (s, 9H).  **$^{13}\text{C}$  NMR**

(**101 MHz, CDCl<sub>3</sub>**)  $\delta$  (ppm) 164.6, 145.7, 145.1, 134.1, 130.7, 129.3, 124.2, 123.6, 122.7, 119.0, 114.7, 80.8, 48.9, 28.2. **FTIR** (cm<sup>-1</sup>)  $\nu$  3391, 2975, 1693, 1150. **HRMS (ESI)** calcd for C<sub>20</sub>H<sub>21</sub>NO<sub>2</sub>Na ([M+Na]<sup>+</sup>): 330.1465; found 330.1462.

**Methyl 1-phenyl-1,2-dihydrobenzo[g]quinoline-3-carboxylate (3m)**

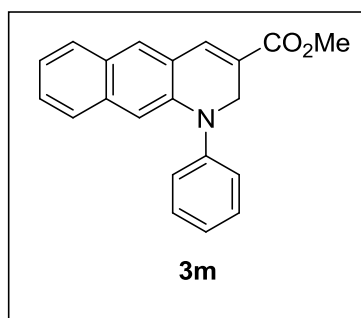

Following GP3 with **1f** (125 mg, 0.39 mmol) and aniline (62 mg, 0.66 mmol) to give 12 mg (10 %) of **3m** as a yellow oil. **<sup>1</sup>H NMR (300 MHz, CDCl<sub>3</sub>)**  $\delta$  (ppm) 7.78 (d,  $J$  = 8.2 Hz, 1H), 7.68 (t,  $J$  = 4.2 Hz, 2H), 7.60 (d,  $J$  = 8.5 Hz, 1H), 7.41 (d,  $J$  = 8.3 Hz, 2H), 7.26-7.24 (m, 1H), 7.16 (t,  $J$  = 7.8 Hz, 2H), 6.98-6.90 (m, 1H), 6.86 (d,  $J$  = 7.8 Hz, 2H), 4.74 (s, 2H), 3.78 (s, 3H). **<sup>13</sup>C NMR (101 MHz, CDCl<sub>3</sub>)**  $\delta$  (ppm) 165.8, 149.8, 139.7, 135.2, 134.8, 129.0, 128.3, 127.6, 126.7, 125.9, 125.8, 125.6, 125.2, 124.3, 123.2, 122.0, 121.3, 51.8, 50.6. **FTIR** (cm<sup>-1</sup>)  $\nu$  3055, 2950, 1704, 1490, 1202. **HRMS (ESI)** calcd for C<sub>21</sub>H<sub>17</sub>NO<sub>2</sub>Na ([M+Na]<sup>+</sup>): 338.1151; found 338.1143.

| Parameters               |                   |
|--------------------------|-------------------|
| Parameter                | Value             |
| 1 Solvent                | CDCl <sub>3</sub> |
| 2 Temperature            | 300.0             |
| 3 Number of Scans        | 5                 |
| 4 Relaxation Delay       | 1.0000            |
| 5 Experiment             | 1D                |
| 6 Spectrometer Frequency | 400.13            |
| 7 Nucleus                | <sup>1</sup> H    |

7.375  
7.372  
7.353  
7.334  
7.265  
7.263  
7.260

6.345

5.836  
5.834  
5.831  
5.584  
5.570

3.733  
3.730

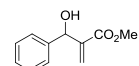

1a

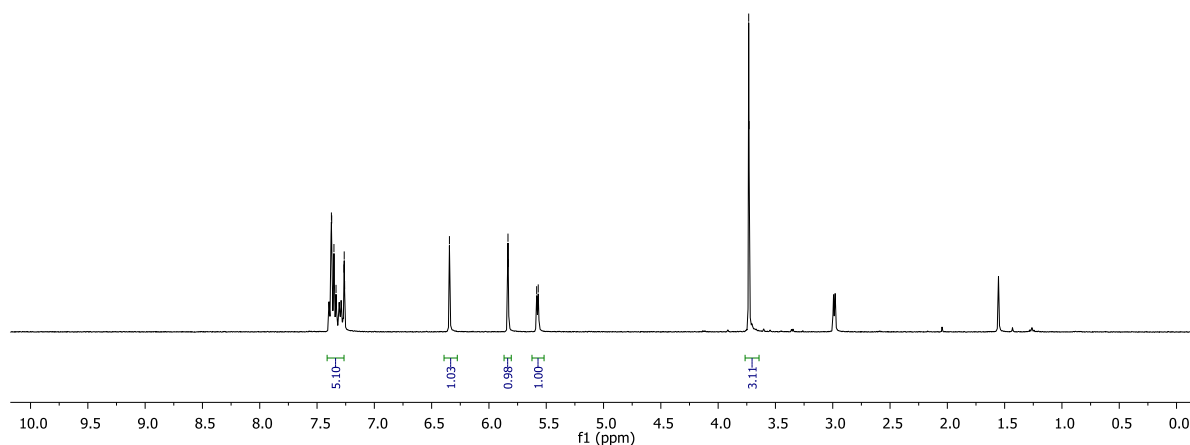

| Parameters               |                   |
|--------------------------|-------------------|
| Parameter                | Value             |
| 1 Solvent                | CDCl <sub>3</sub> |
| 2 Temperature            | 300.0             |
| 3 Number of Scans        | 32                |
| 4 Relaxation Delay       | 2.0000            |
| 5 Experiment             | 1D                |
| 6 Spectrometer Frequency | 75.48             |
| 7 Nucleus                | <sup>13</sup> C   |

166.676

141.948  
141.233

128.340  
127.736  
126.532  
125.959

77.424 CDCl<sub>3</sub>  
77.000 CDCl<sub>3</sub>  
76.576 CDCl<sub>3</sub>  
73.090

51.851

26.848

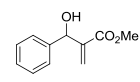

1a

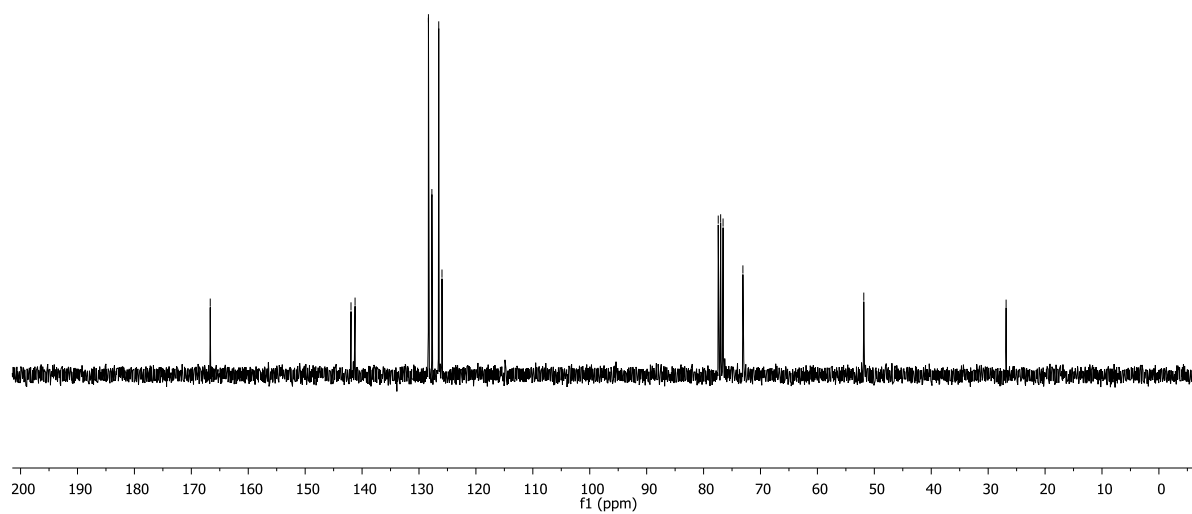



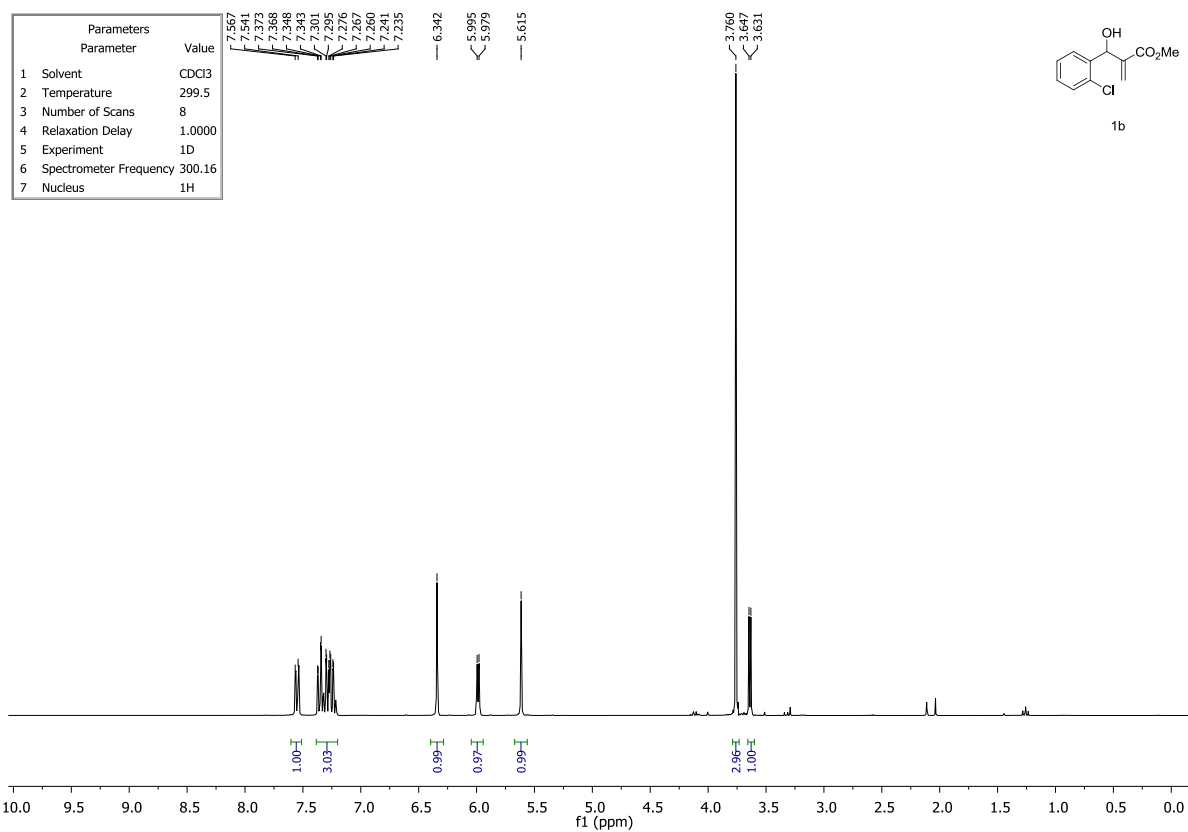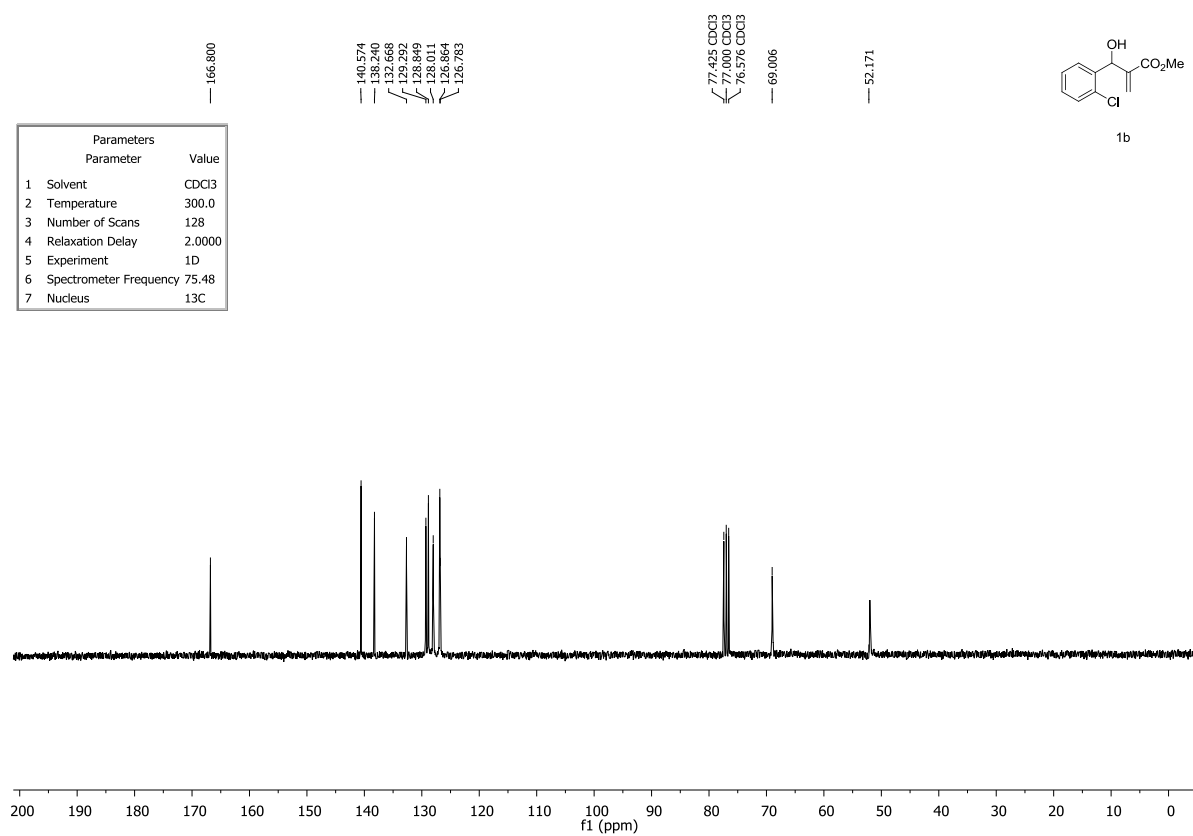

| Parameters               |                   |  |
|--------------------------|-------------------|--|
| Parameter                | Value             |  |
| 1 Solvent                | CDCl <sub>3</sub> |  |
| 2 Temperature            | 300.0             |  |
| 3 Number of Scans        | 8                 |  |
| 4 Relaxation Delay       | 1.0000            |  |
| 5 Experiment             | 1D                |  |
| 6 Spectrometer Frequency | 300.16            |  |
| 7 Nucleus                | 1H                |  |

7.523  
7.497  
7.329  
7.304  
7.279  
7.260  
7.155  
7.150  
7.135  
7.104  
7.099

6.312

5.923  
5.909

5.563

3.729  
3.572  
3.560

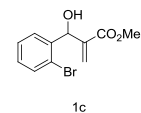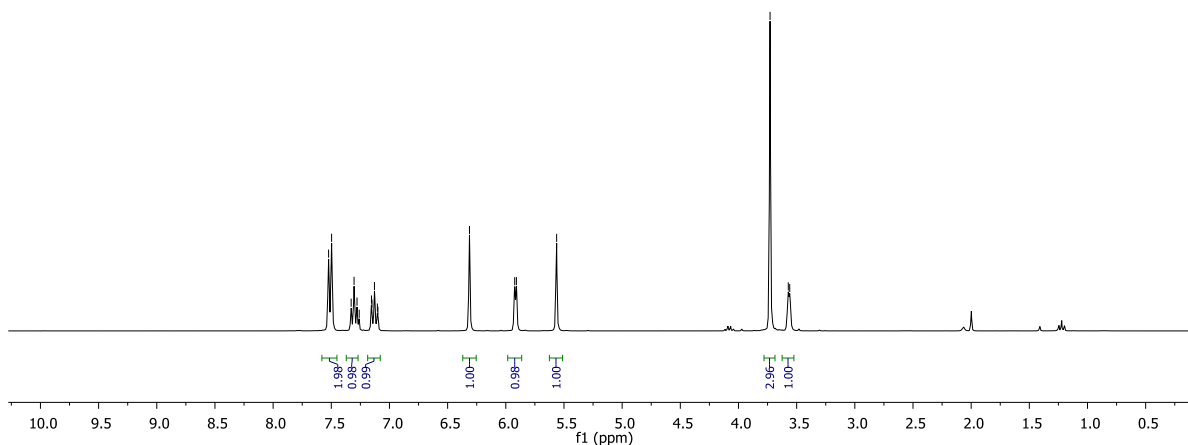

| Parameters               |                   |  |
|--------------------------|-------------------|--|
| Parameter                | Value             |  |
| 1 Solvent                | CDCl <sub>3</sub> |  |
| 2 Temperature            | 294.9             |  |
| 3 Number of Scans        | 512               |  |
| 4 Relaxation Delay       | 2.0000            |  |
| 5 Experiment             | 1D                |  |
| 6 Spectrometer Frequency | 75.48             |  |
| 7 Nucleus                | 13C               |  |

166.994

140.541  
139.732

132.740  
129.340  
128.867  
127.165  
123.079

77.424 CDCl<sub>3</sub>  
77.000 CDCl<sub>3</sub>  
76.577 CDCl<sub>3</sub>  
71.499

52.154

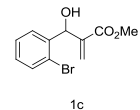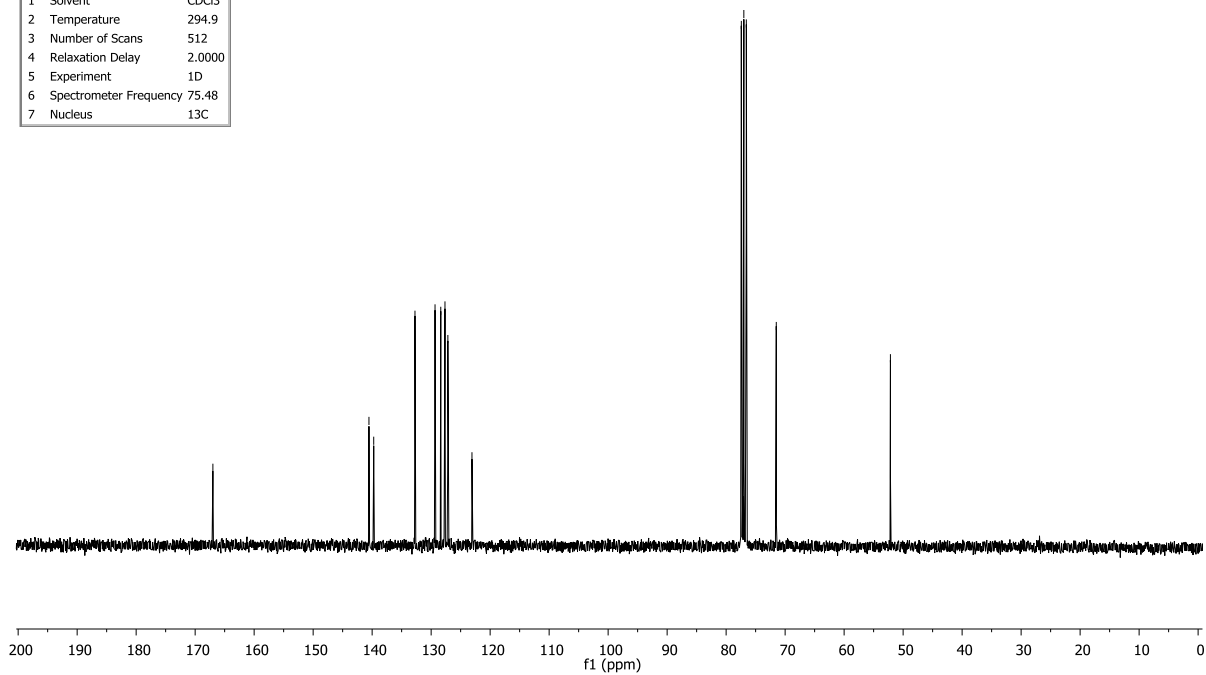

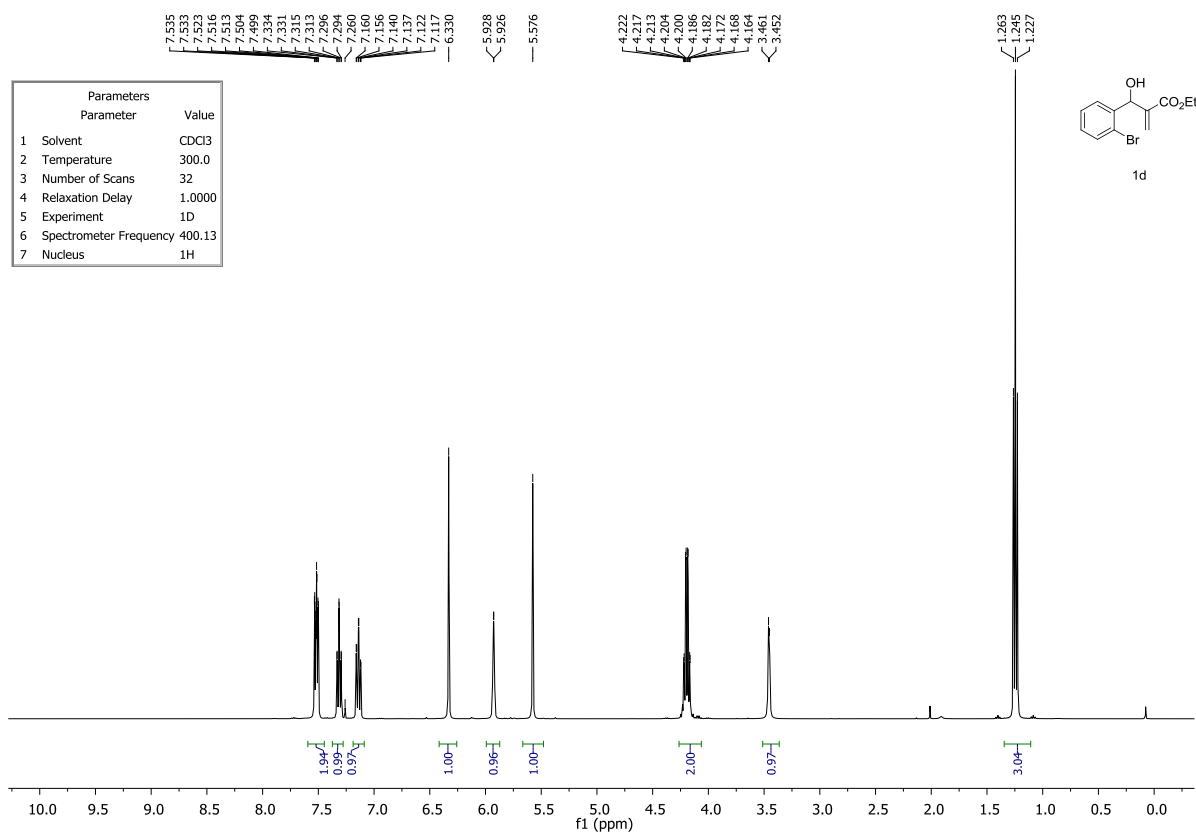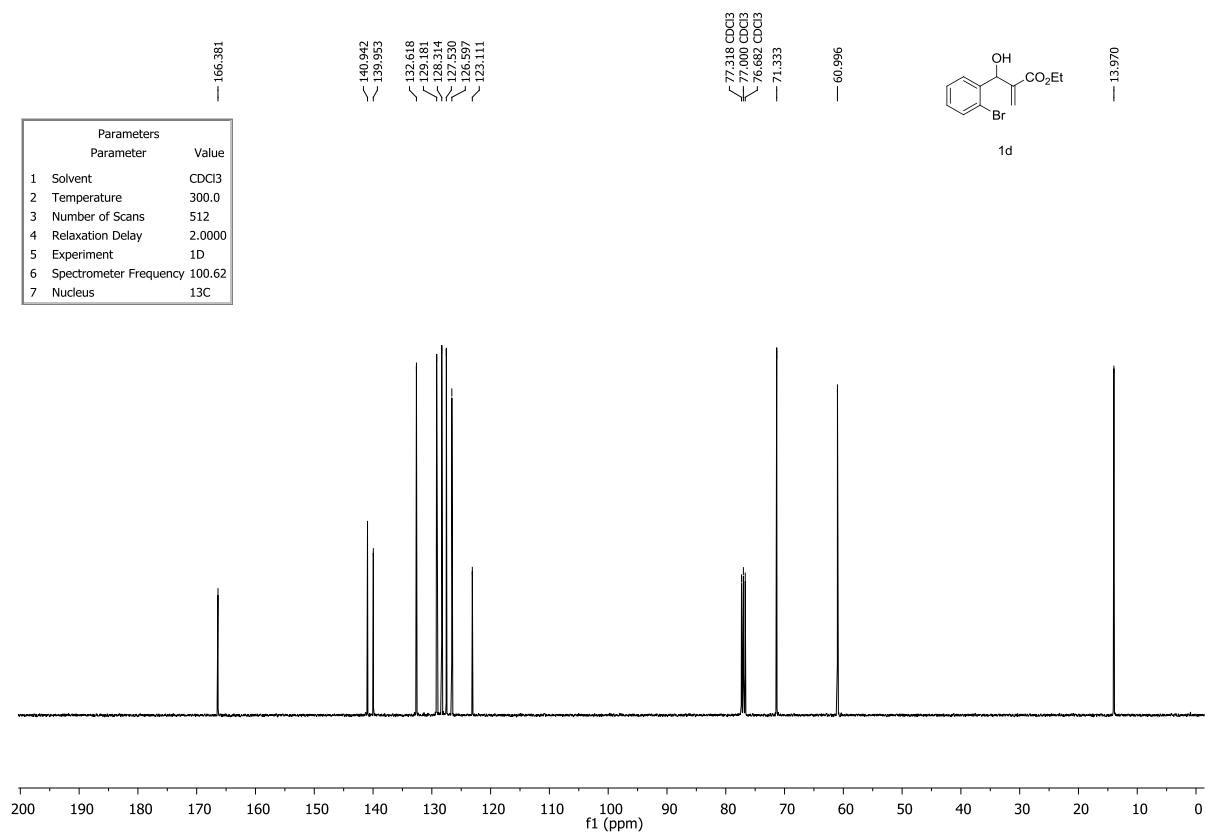

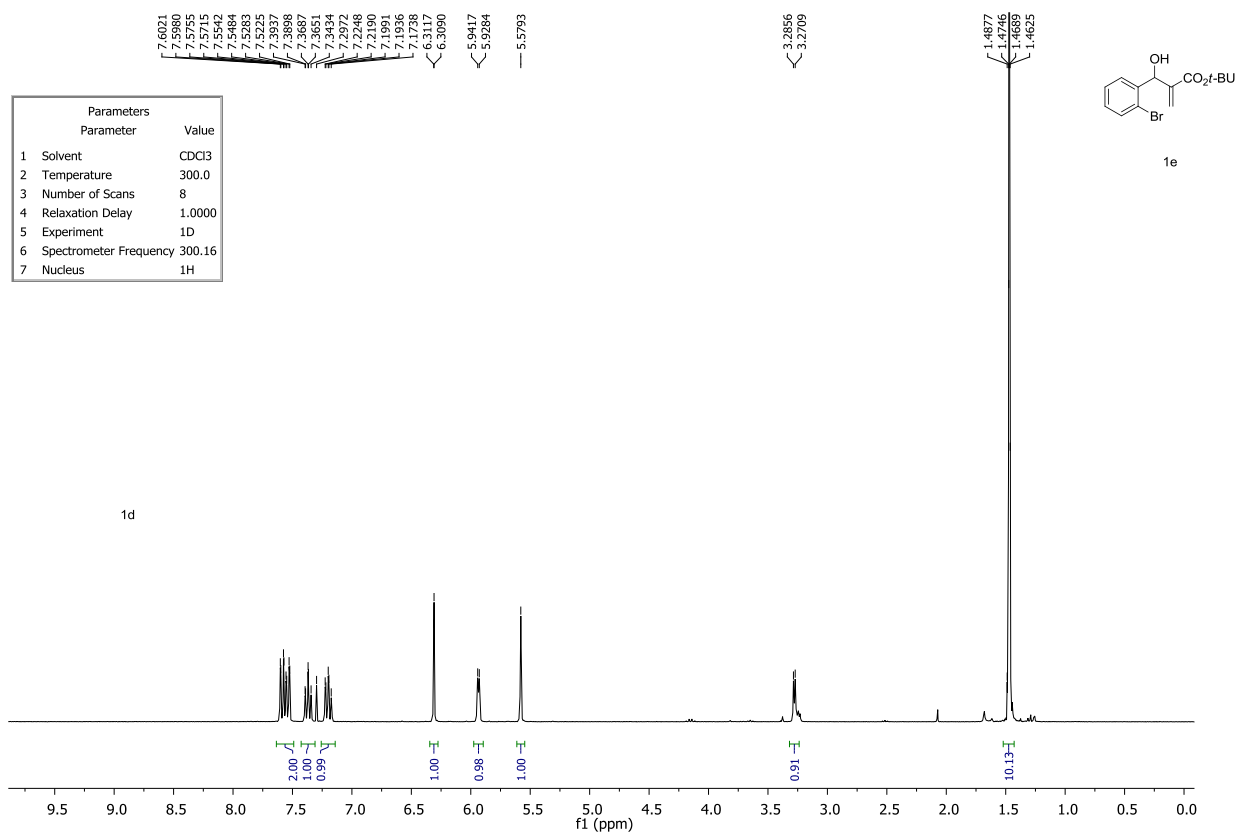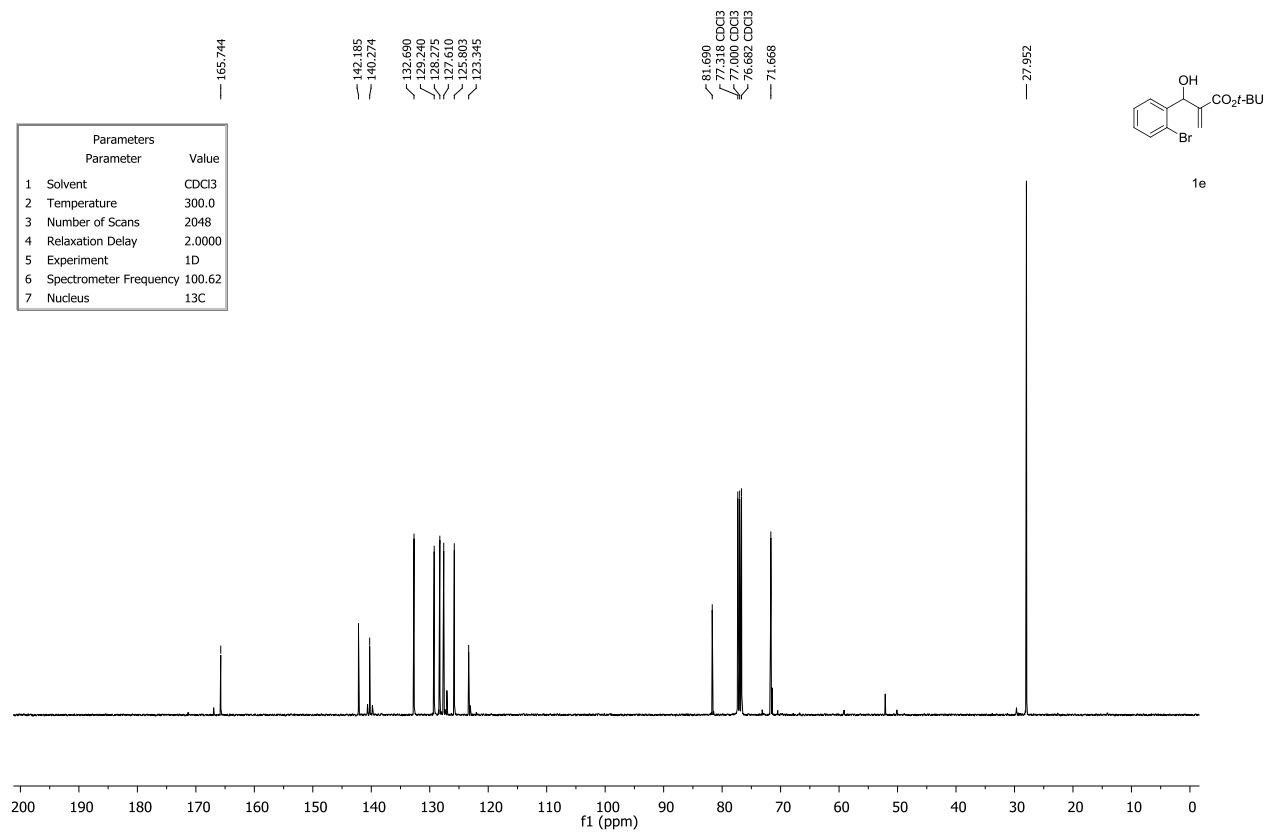

MML-JO-2-316-2

| Parameter                | Value          |
|--------------------------|----------------|
| 1 Solvent                | CDCl3          |
| 2 Temperature            | 300.0          |
| 3 Number of Scans        | 32             |
| 4 Relaxation Delay       | 1.0000         |
| 5 Spectrometer Frequency | 400.13         |
| 6 Nucleus                | <sup>1</sup> H |

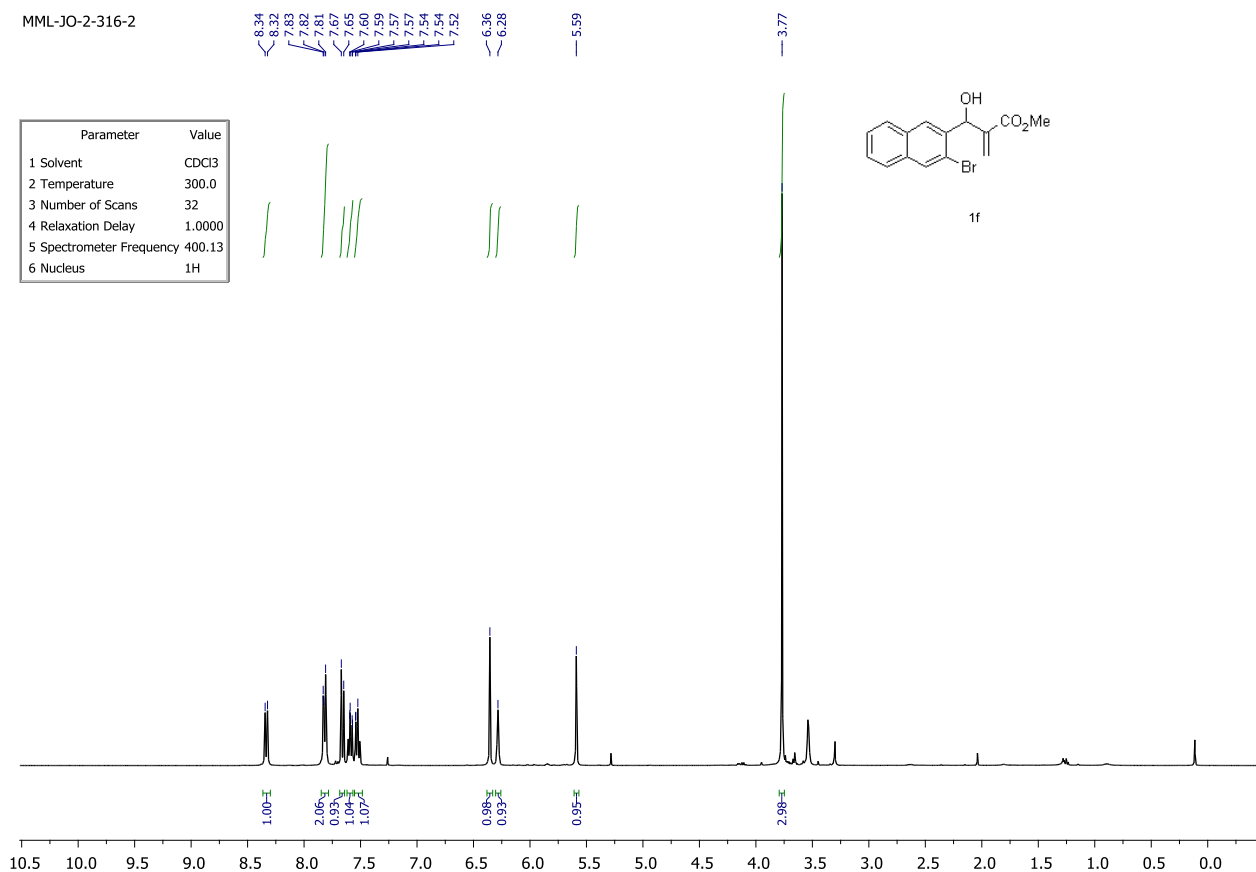

| Parameters               | Value          |
|--------------------------|----------------|
| 1 Title                  | MML-JO-2-316-2 |
| 2 Solvent                | CDCl3          |
| 3 Experiment             | 1D             |
| 4 Spectrometer Frequency | 100.62         |

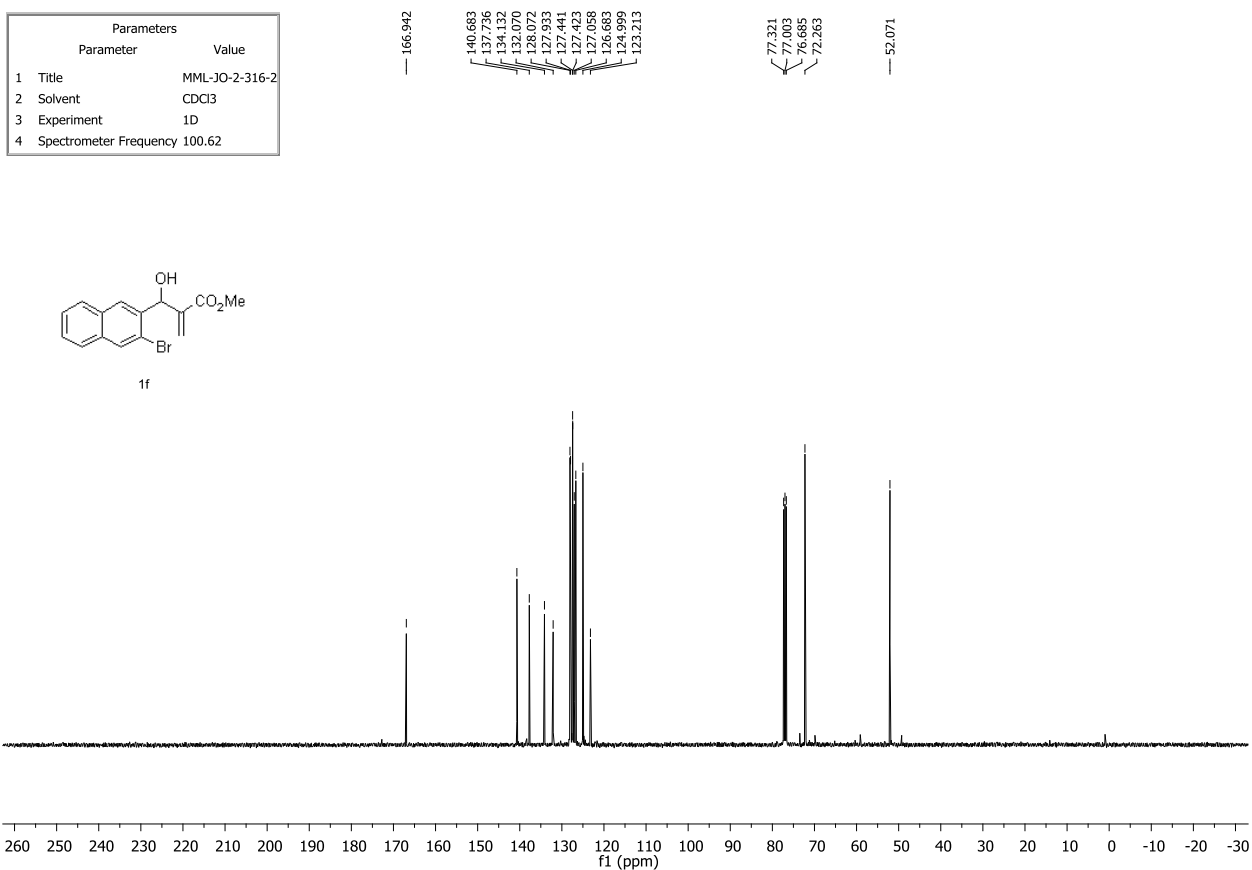

jo-2-301

| Parameter                | Value             |
|--------------------------|-------------------|
| 1 Solvent                | CDCl <sub>3</sub> |
| 2 Temperature            | 300.1             |
| 3 Number of Scans        | 8                 |
| 4 Relaxation Delay       | 1.0000            |
| 5 Spectrometer Frequency | 300.16            |
| 6 Nucleus                | <sup>1</sup> H    |

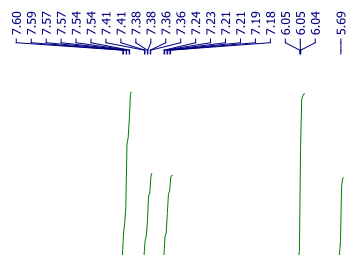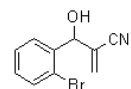

1g

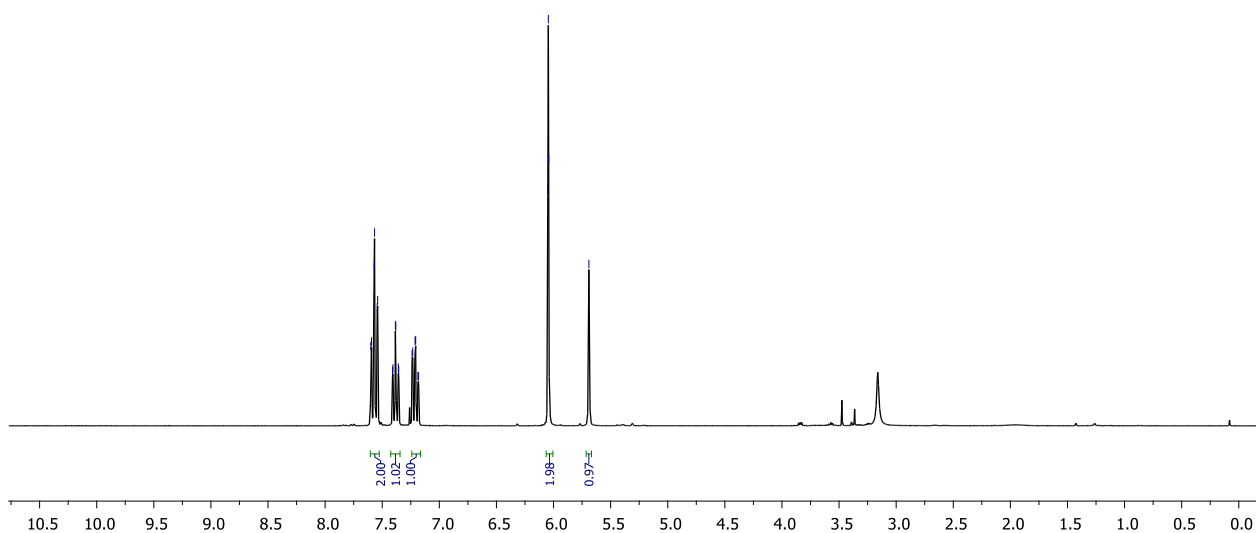

jo-2-301

| Parameter                | Value             |
|--------------------------|-------------------|
| 1 Solvent                | CDCl <sub>3</sub> |
| 2 Temperature            | 300.0             |
| 3 Number of Scans        | 64                |
| 4 Relaxation Delay       | 2.0000            |
| 5 Spectrometer Frequency | 75.48             |
| 6 Nucleus                | <sup>13</sup> C   |

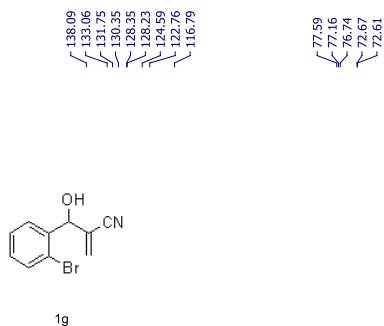

1g

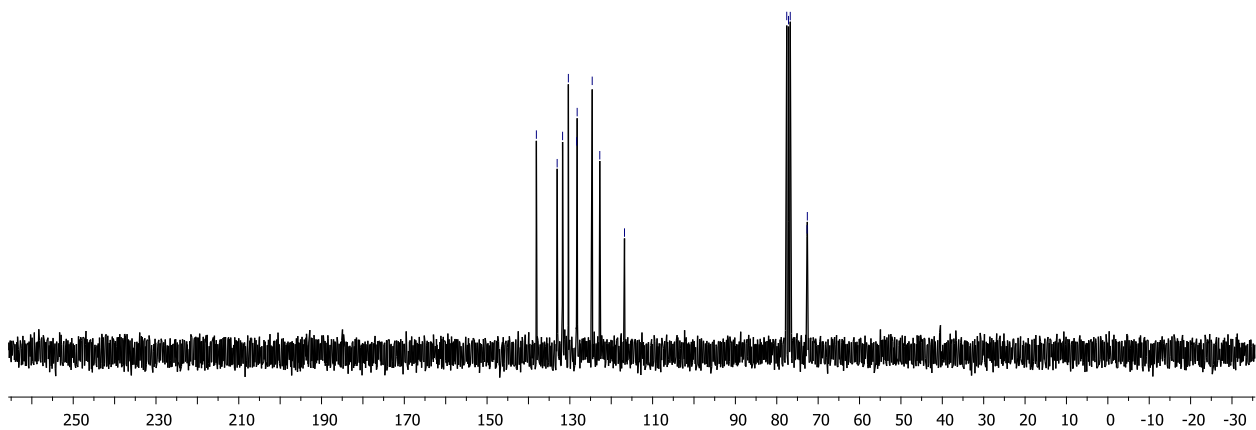

jo-2-197

<sup>1</sup>H routine 8 scans

| Parameter                | Value             |
|--------------------------|-------------------|
| 1 Solvent                | CDCl <sub>3</sub> |
| 2 Temperature            | 300.0             |
| 3 Number of Scans        | 8                 |
| 4 Relaxation Delay       | 1.0000            |
| 5 Spectrometer Frequency | 300.16            |
| 6 Nucleus                | <sup>1</sup> H    |

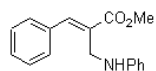

2a

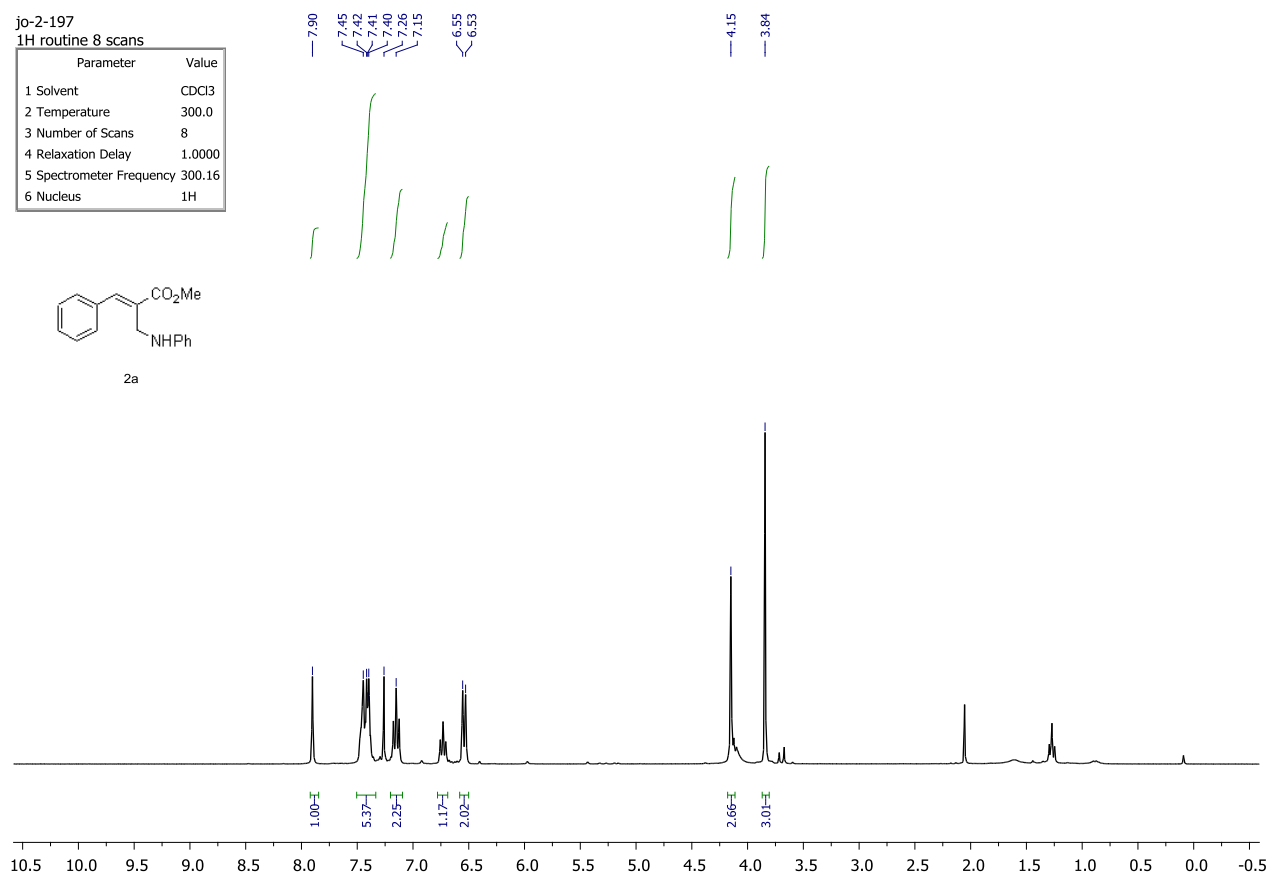

JO-2-197

| Parameter                | Value             |
|--------------------------|-------------------|
| 1 Solvent                | CDCl <sub>3</sub> |
| 2 Temperature            | 300.0             |
| 3 Number of Scans        | 512               |
| 4 Relaxation Delay       | 2.0000            |
| 5 Spectrometer Frequency | 75.48             |
| 6 Nucleus                | <sup>13</sup> C   |

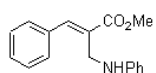

2a

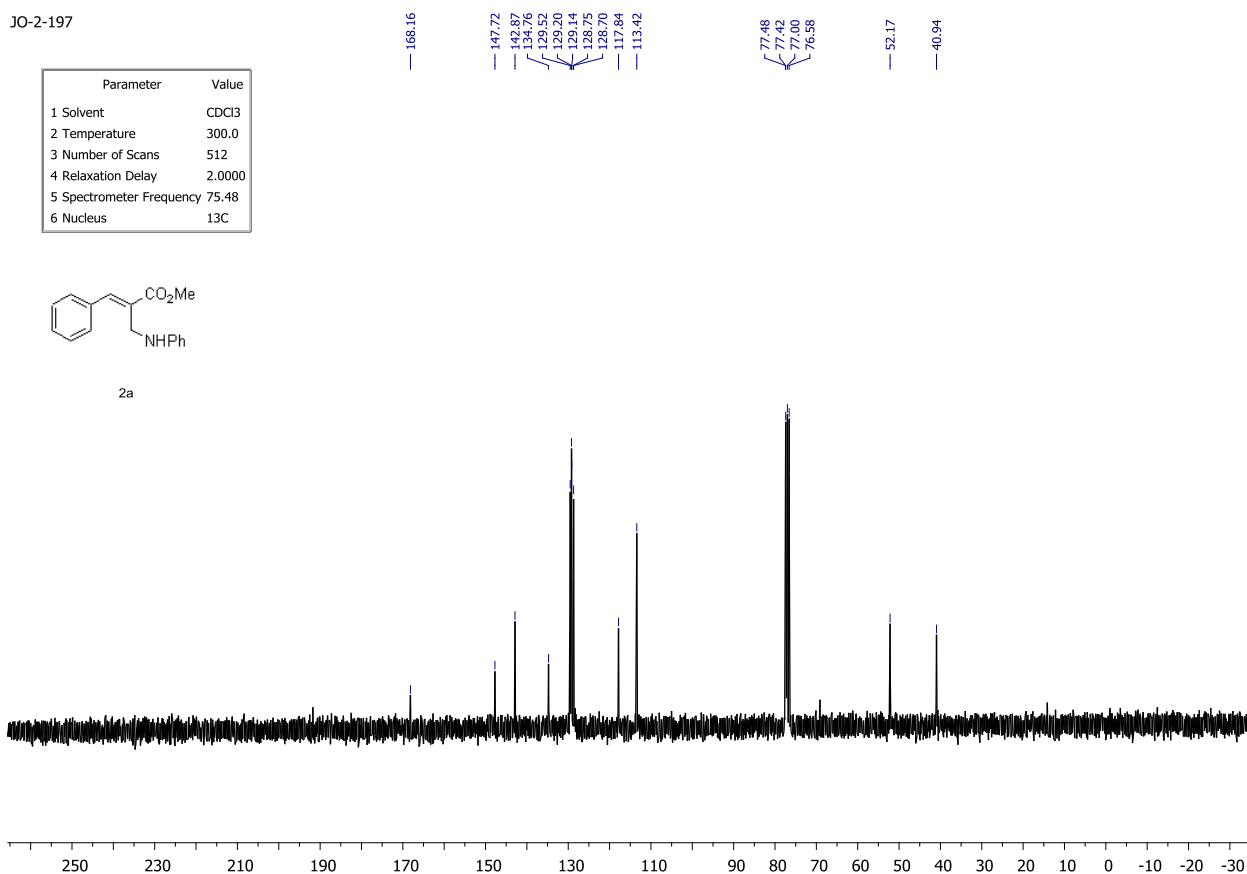

mml075-f2

| Parameter                | Value             |
|--------------------------|-------------------|
| 1 Solvent                | CDCl <sub>3</sub> |
| 2 Temperature            | 300.0             |
| 3 Number of Scans        | 8                 |
| 4 Relaxation Delay       | 1.0000            |
| 5 Spectrometer Frequency | 300.16            |
| 6 Nucleus                | <sup>1</sup> H    |

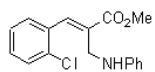

2b

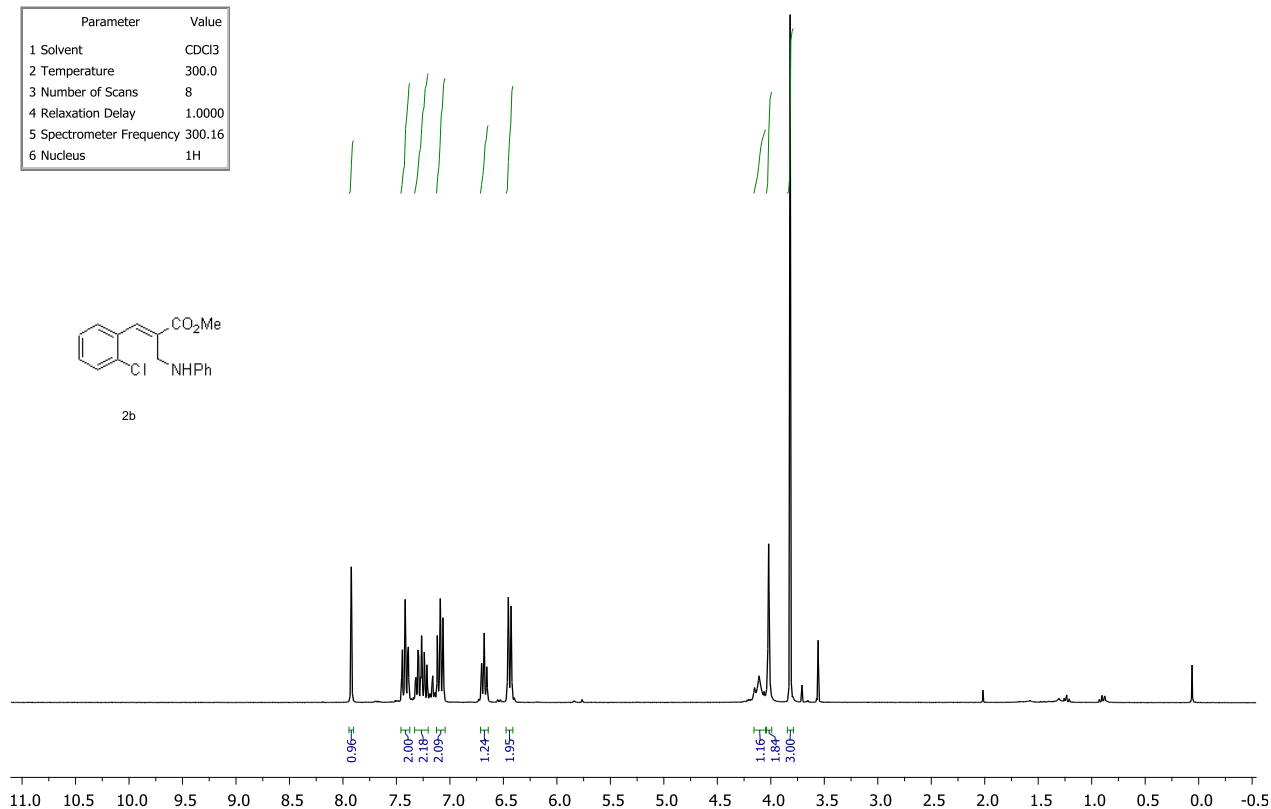

mml075-f2  
13C routine  
decouple 1H  
32 scans

| Parameter                | Value             |
|--------------------------|-------------------|
| 1 Solvent                | CDCl <sub>3</sub> |
| 2 Temperature            | 300.1             |
| 3 Number of Scans        | 32                |
| 4 Relaxation Delay       | 2.0000            |
| 5 Spectrometer Frequency | 100.61            |
| 6 Nucleus                | <sup>13</sup> C   |

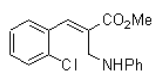

2b

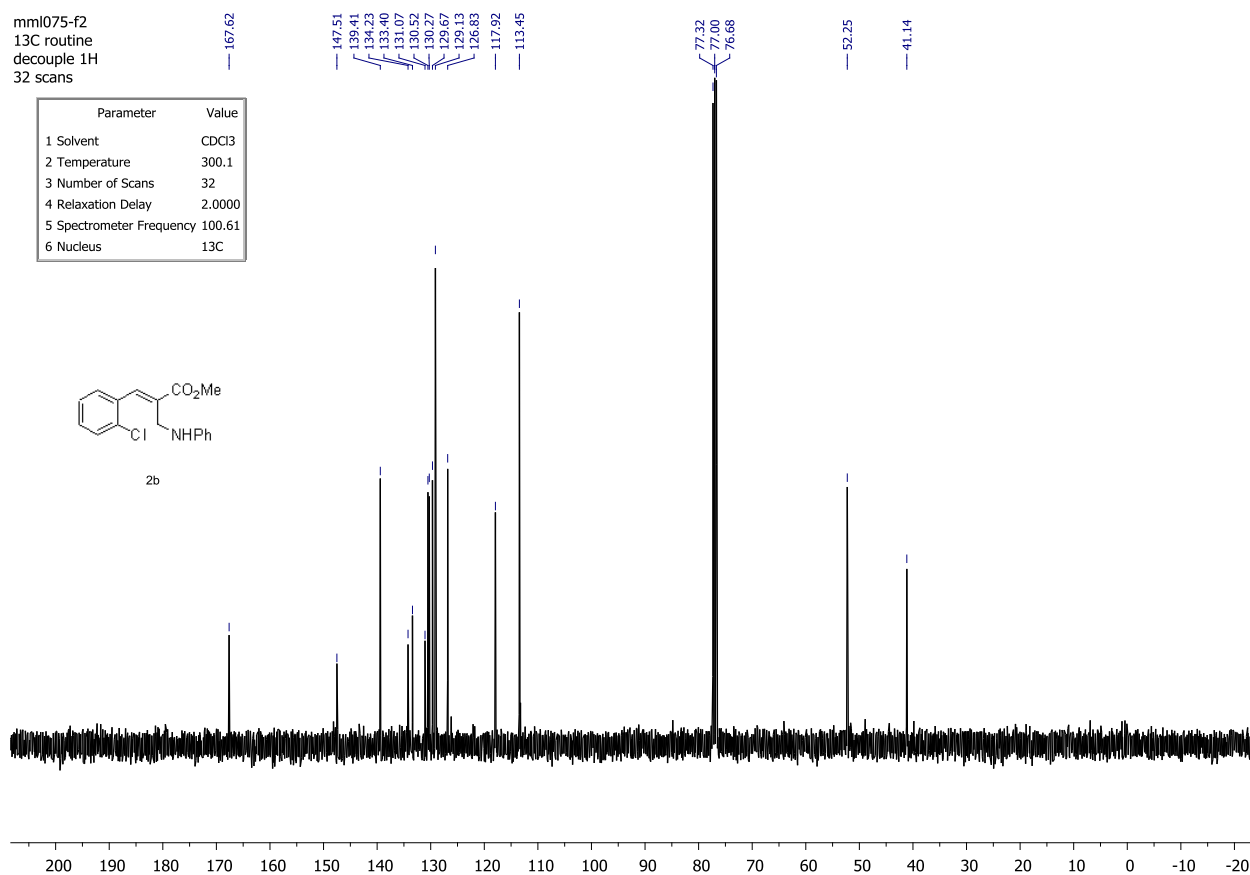



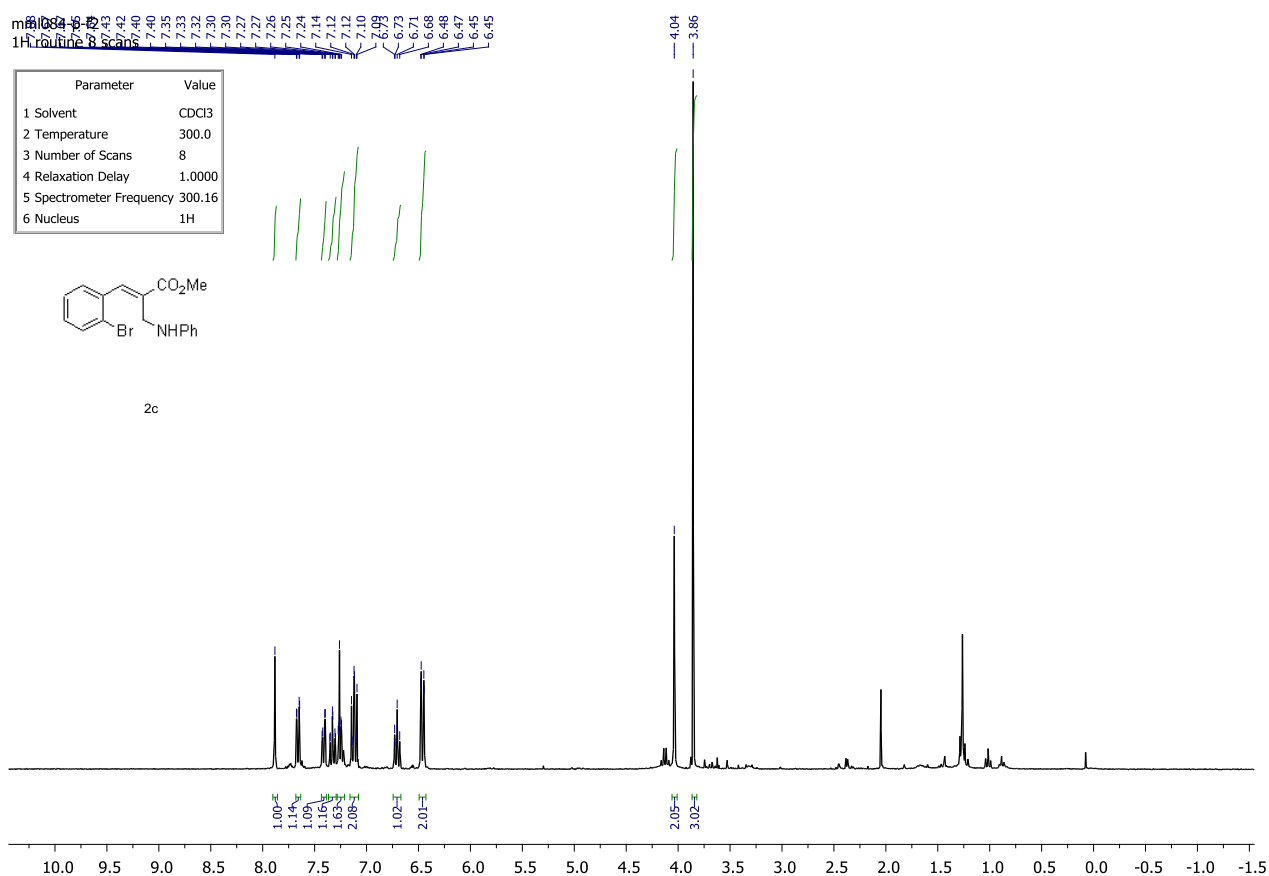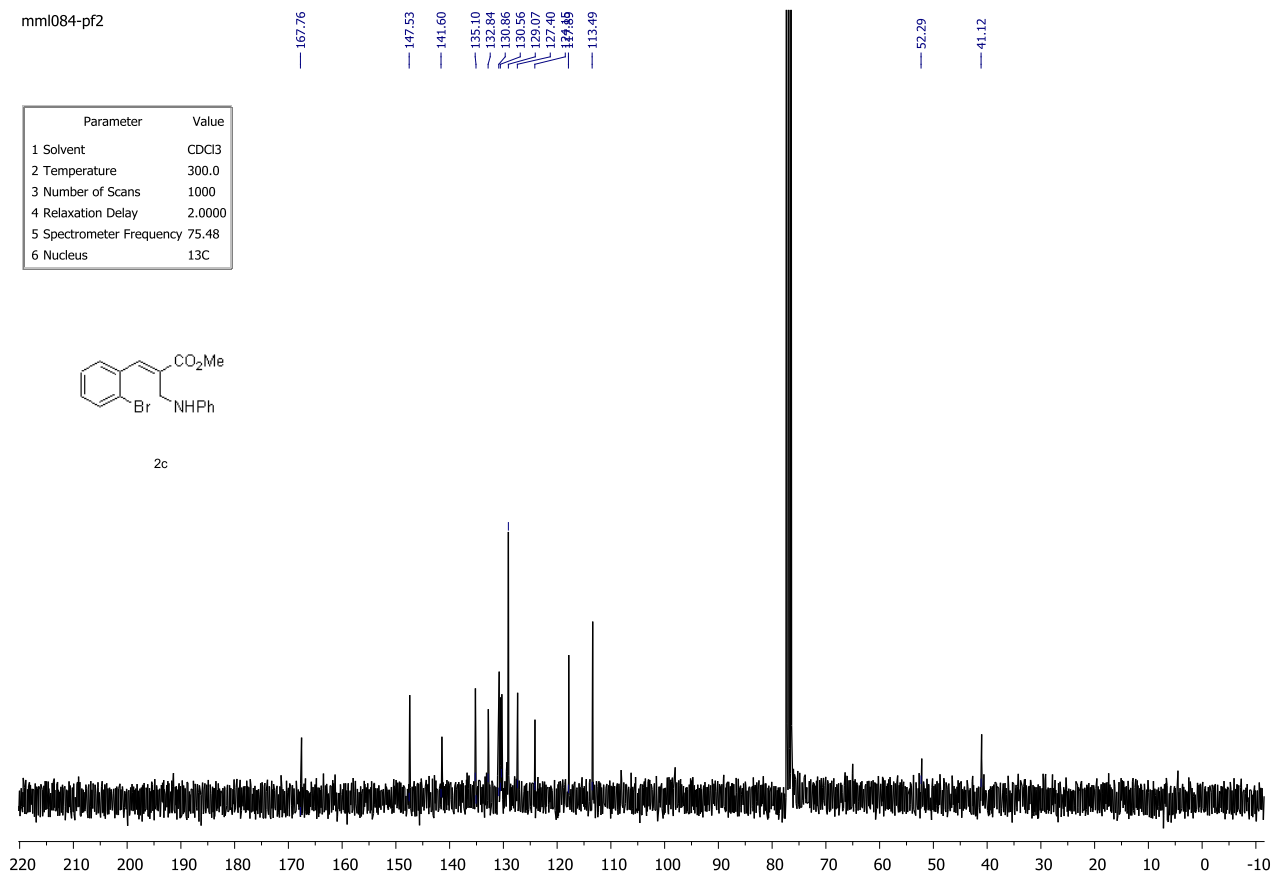

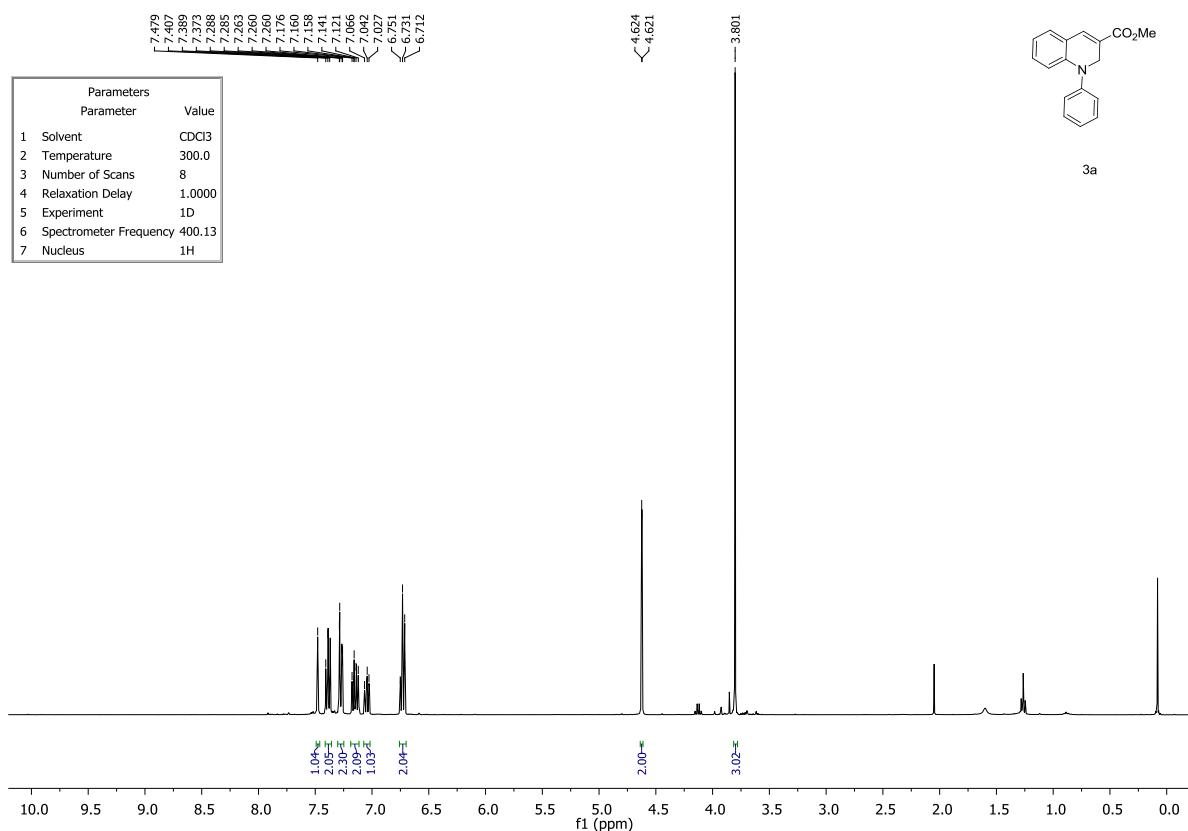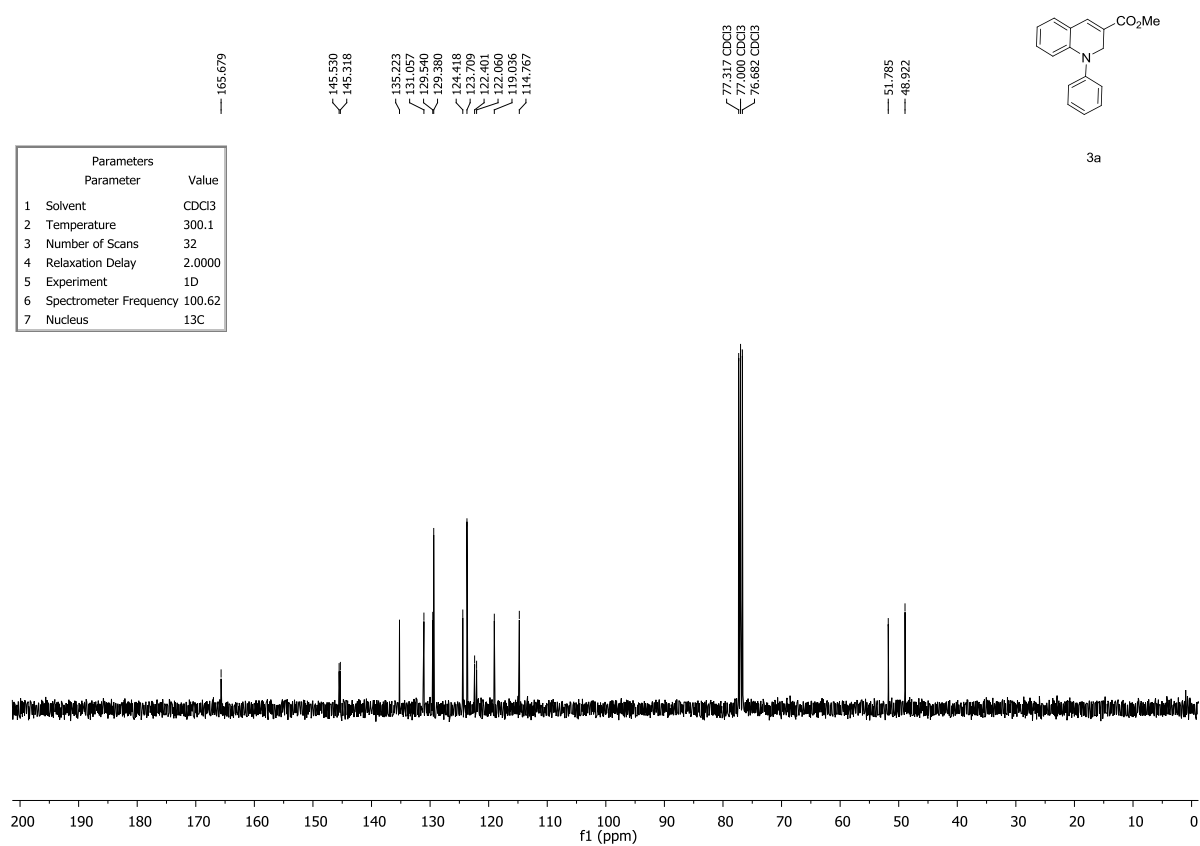

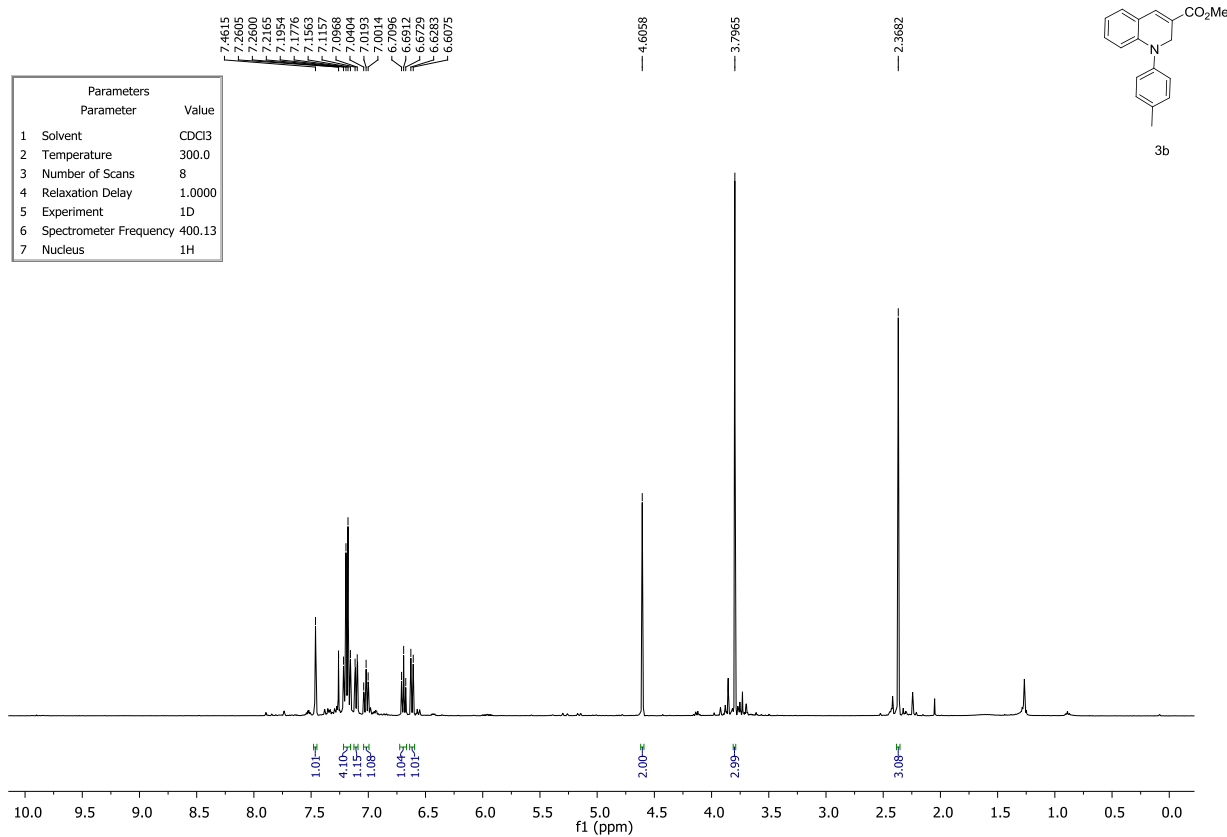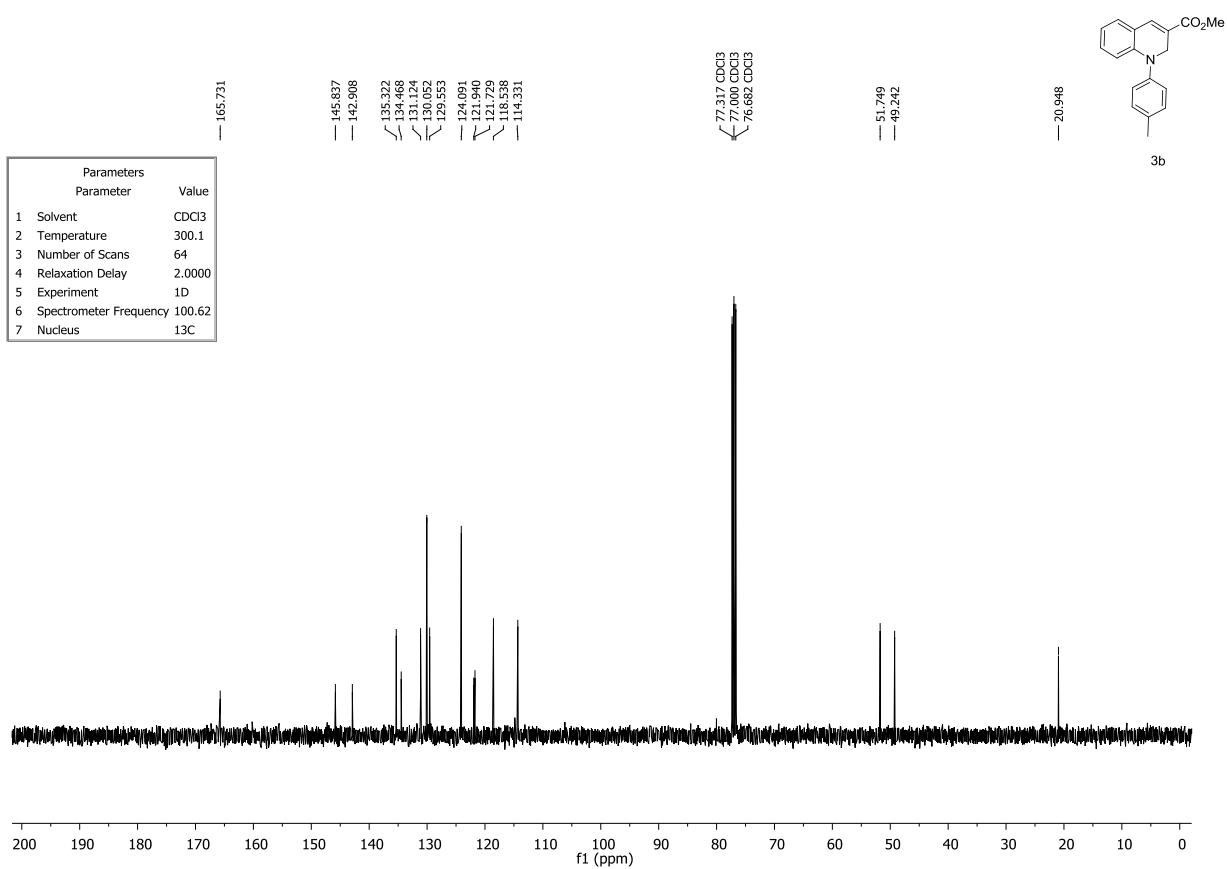

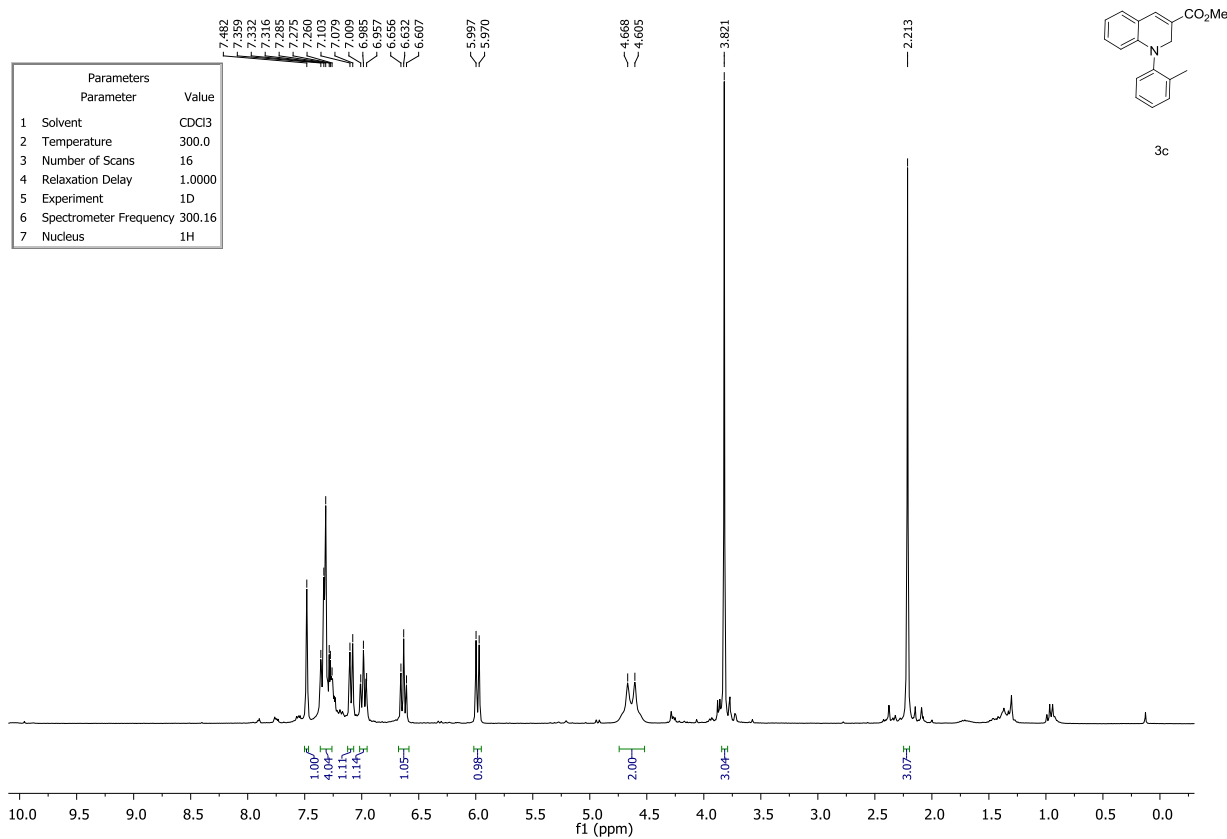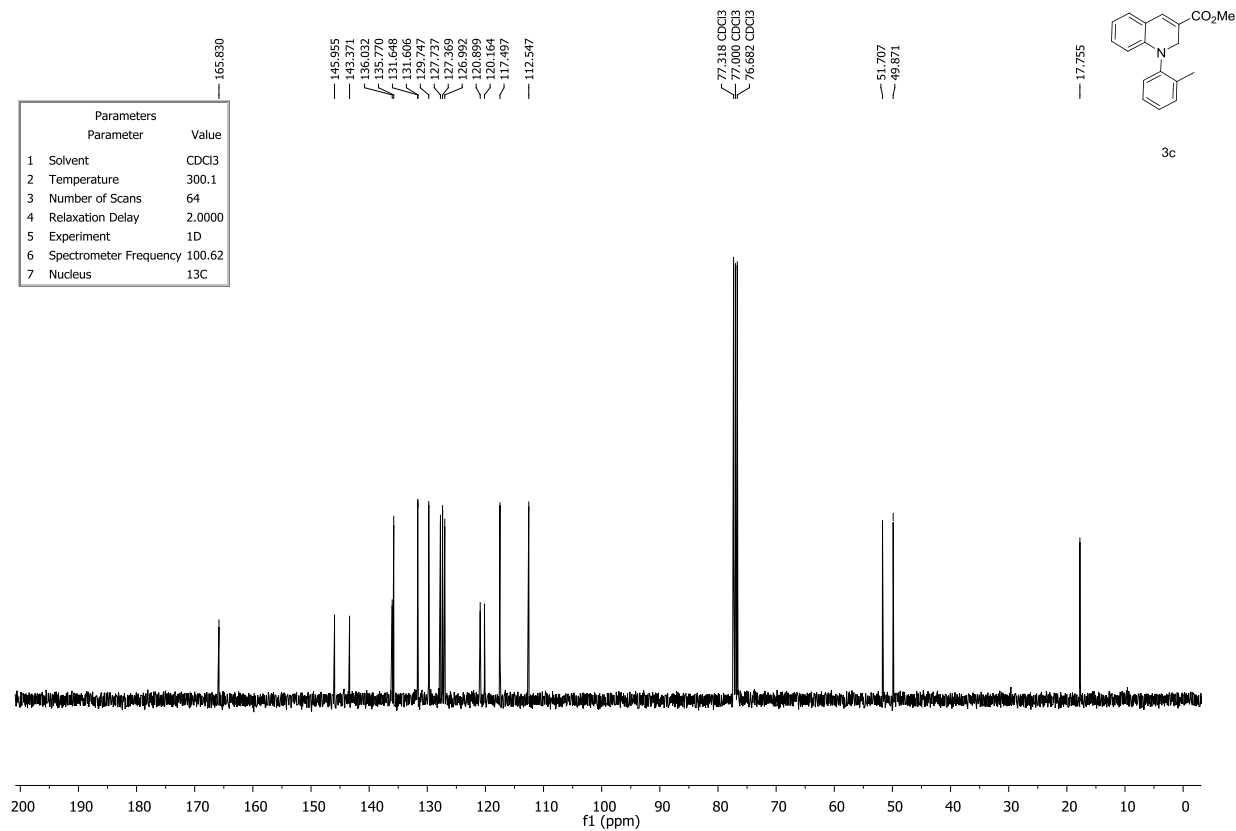

| Parameters               |                   |
|--------------------------|-------------------|
| Parameter                | Value             |
| 1 Solvent                | CDCl <sub>3</sub> |
| 2 Temperature            | 300.0             |
| 3 Number of Scans        | 8                 |
| 4 Relaxation Delay       | 1.0000            |
| 5 Experiment             | 1D                |
| 6 Spectrometer Frequency | 400.13            |
| 7 Nucleus                | <sup>1</sup> H    |

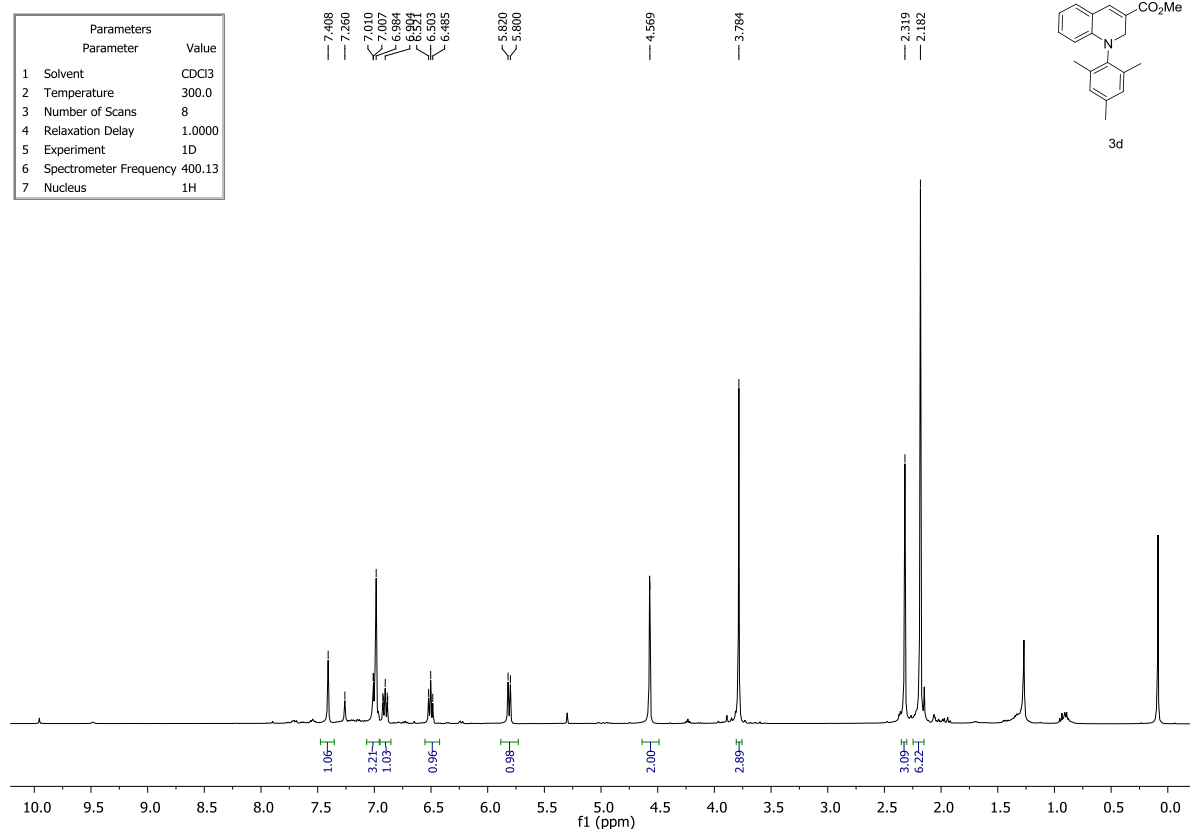

| Parameters               |                   |
|--------------------------|-------------------|
| Parameter                | Value             |
| 1 Solvent                | CDCl <sub>3</sub> |
| 2 Temperature            | 300.1             |
| 3 Number of Scans        | 64                |
| 4 Relaxation Delay       | 2.0000            |
| 5 Experiment             | 1D                |
| 6 Spectrometer Frequency | 100.62            |
| 7 Nucleus                | <sup>13</sup> C   |

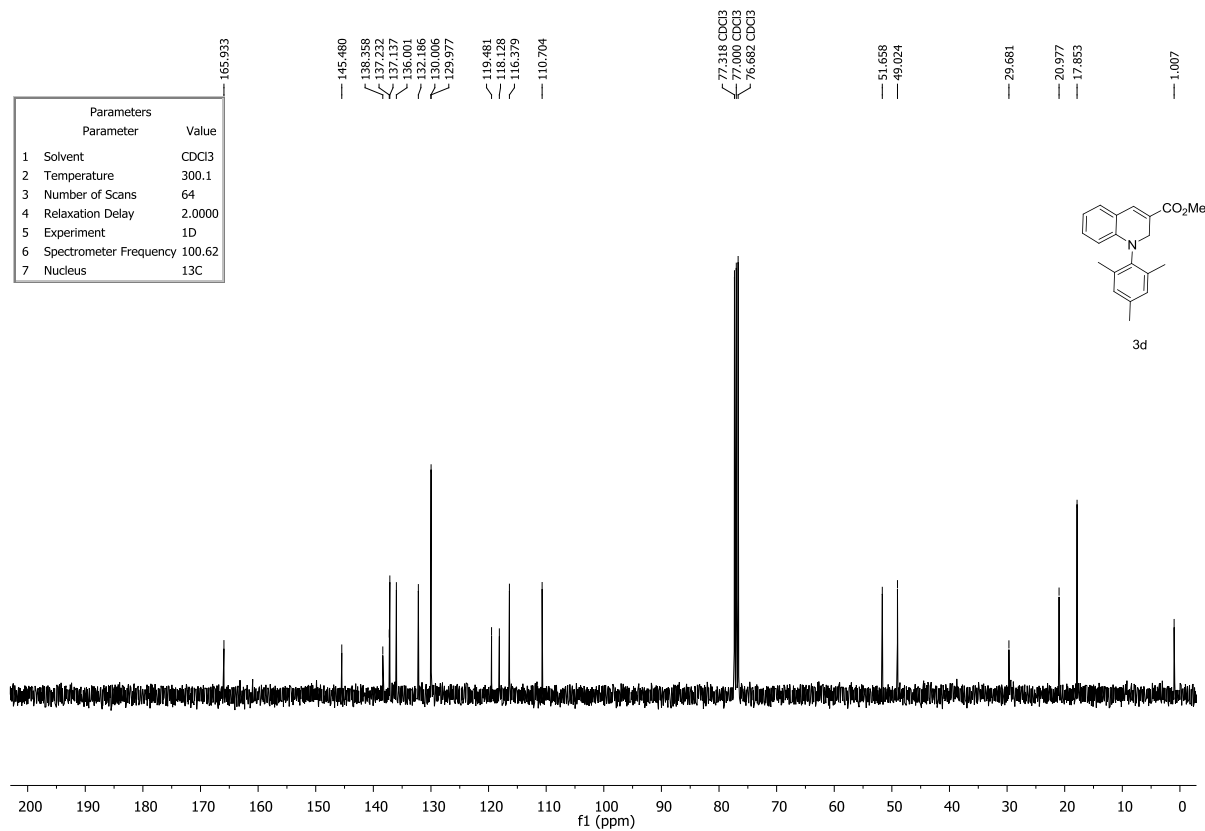

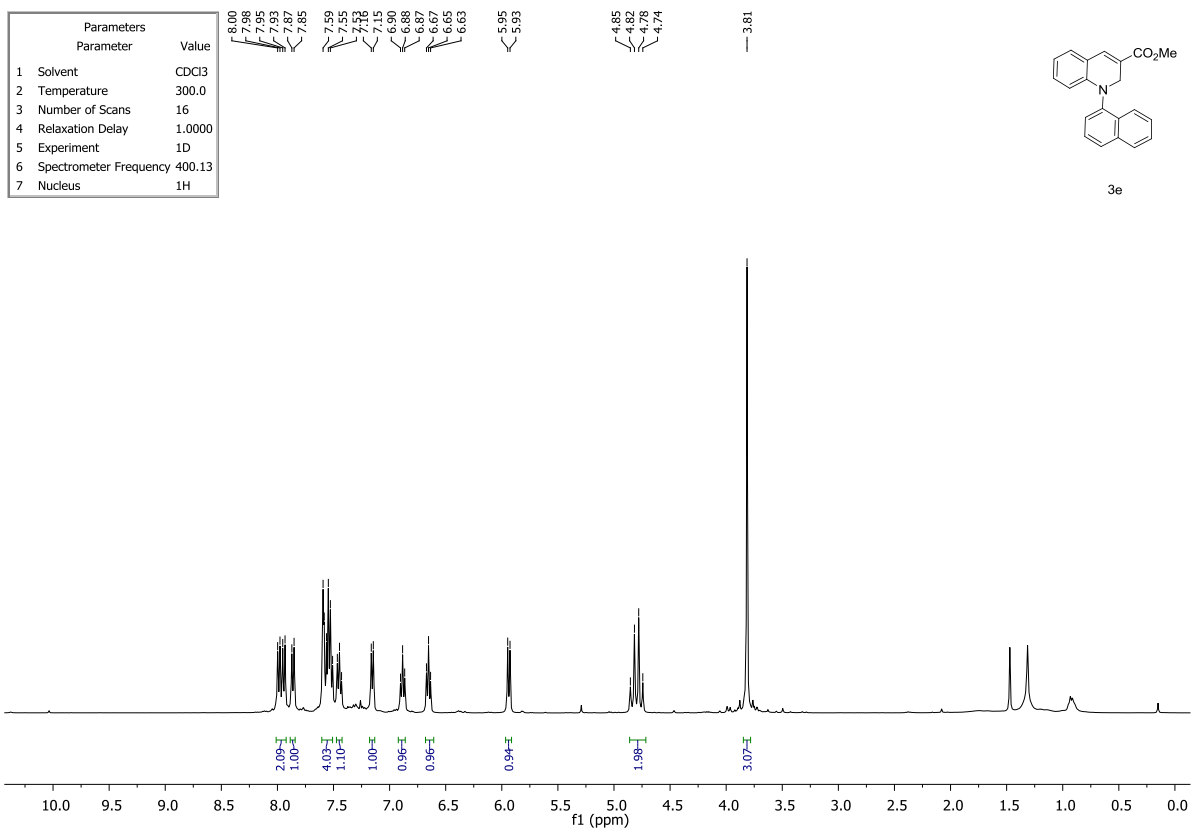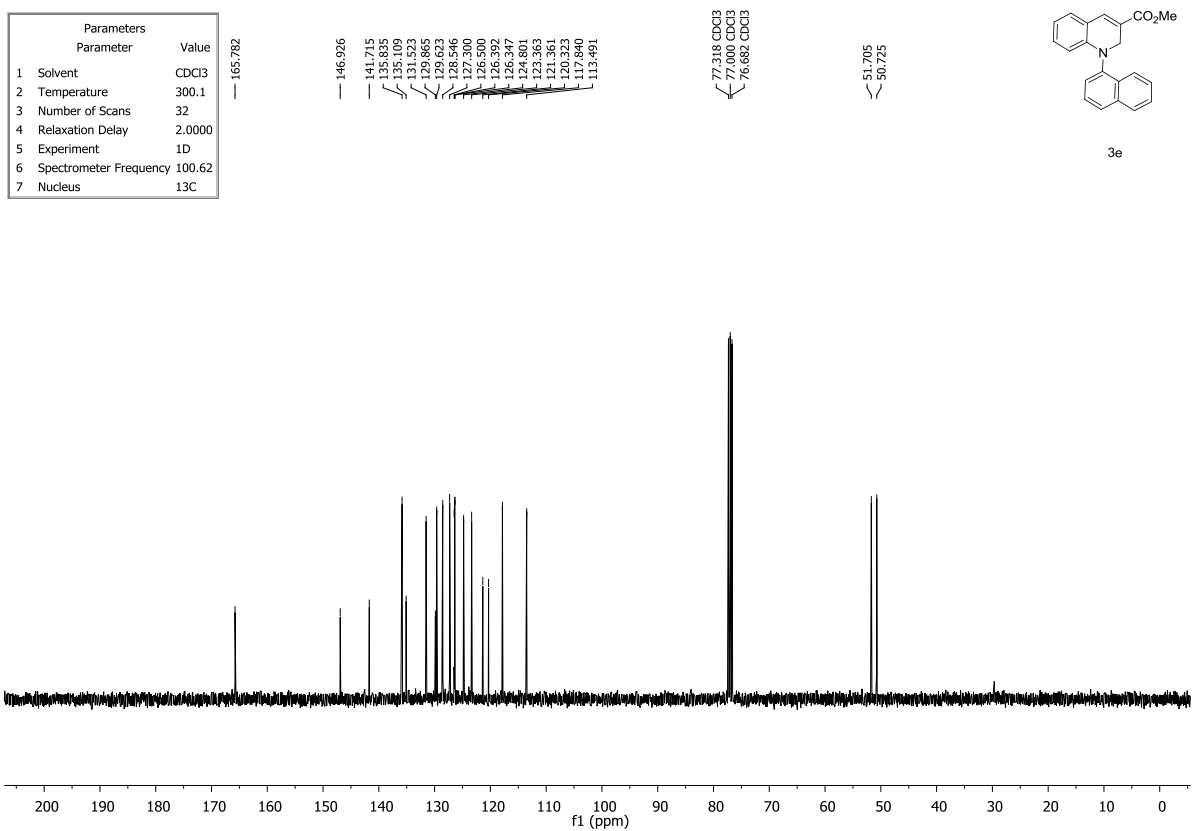

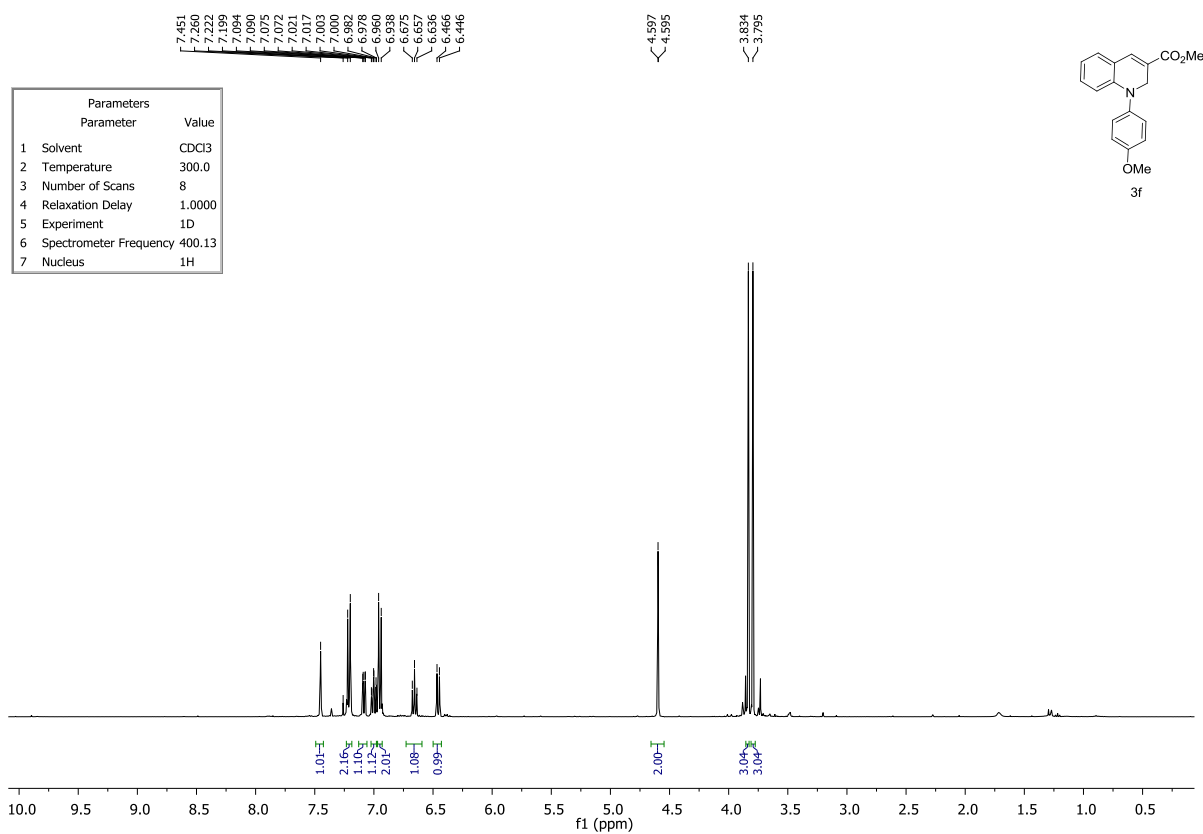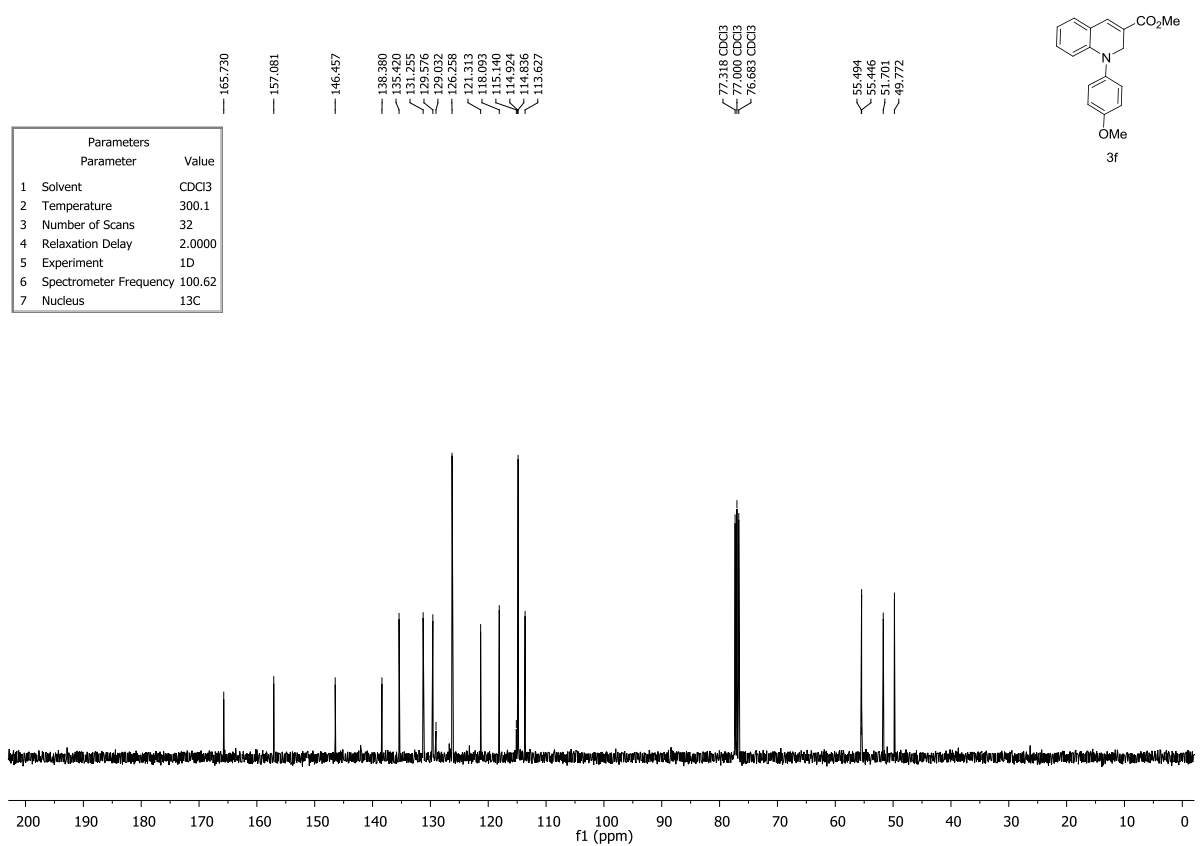

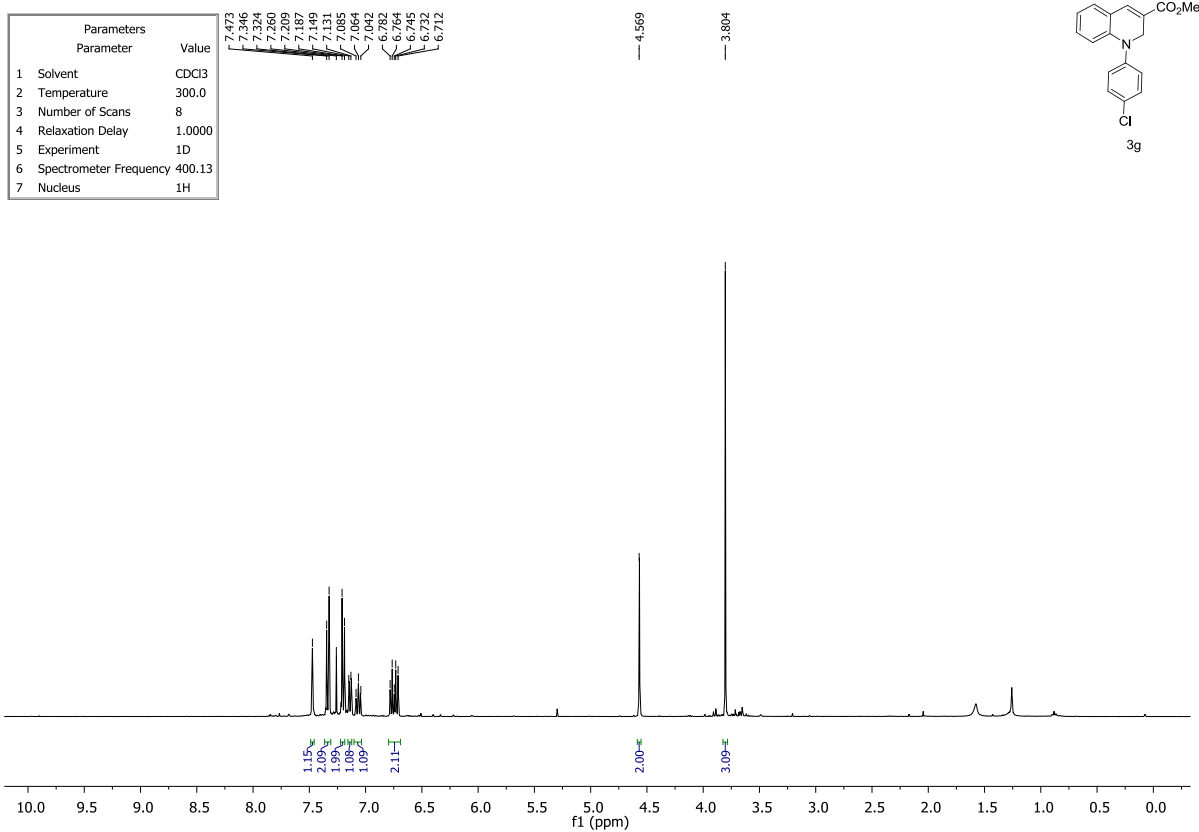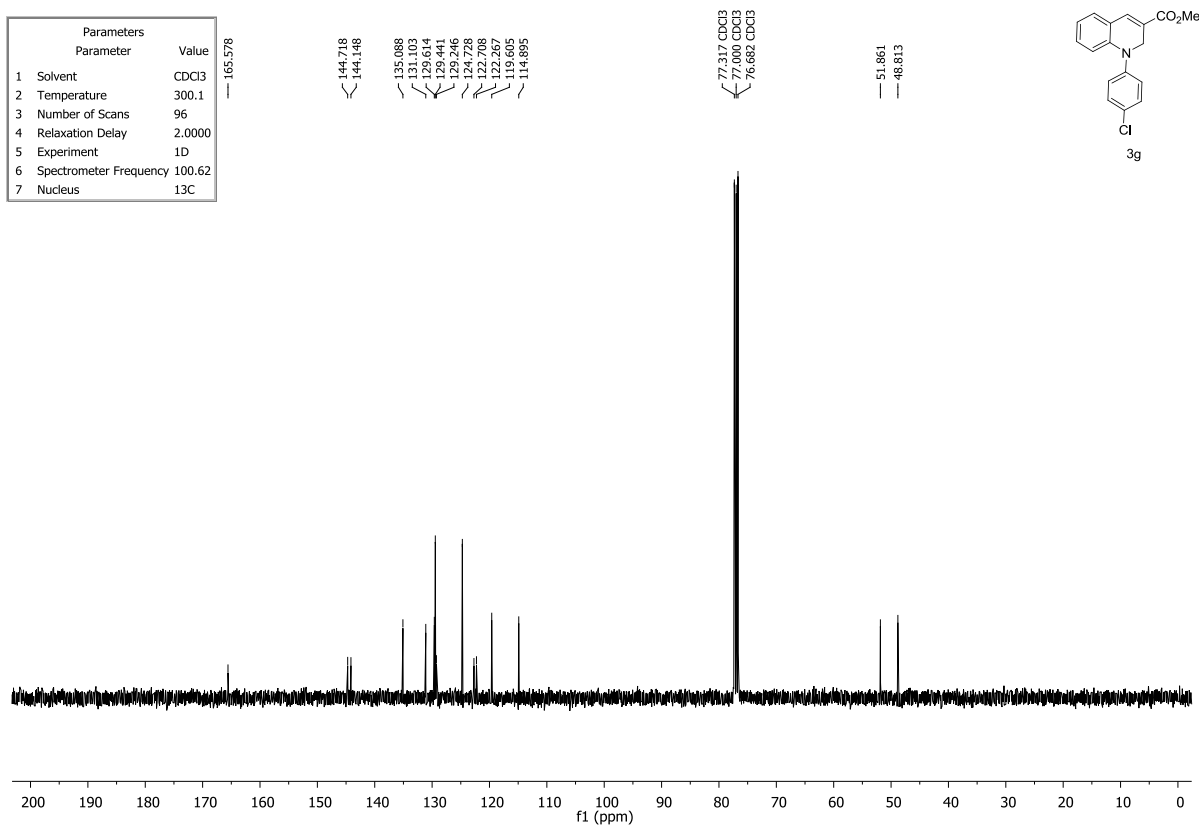



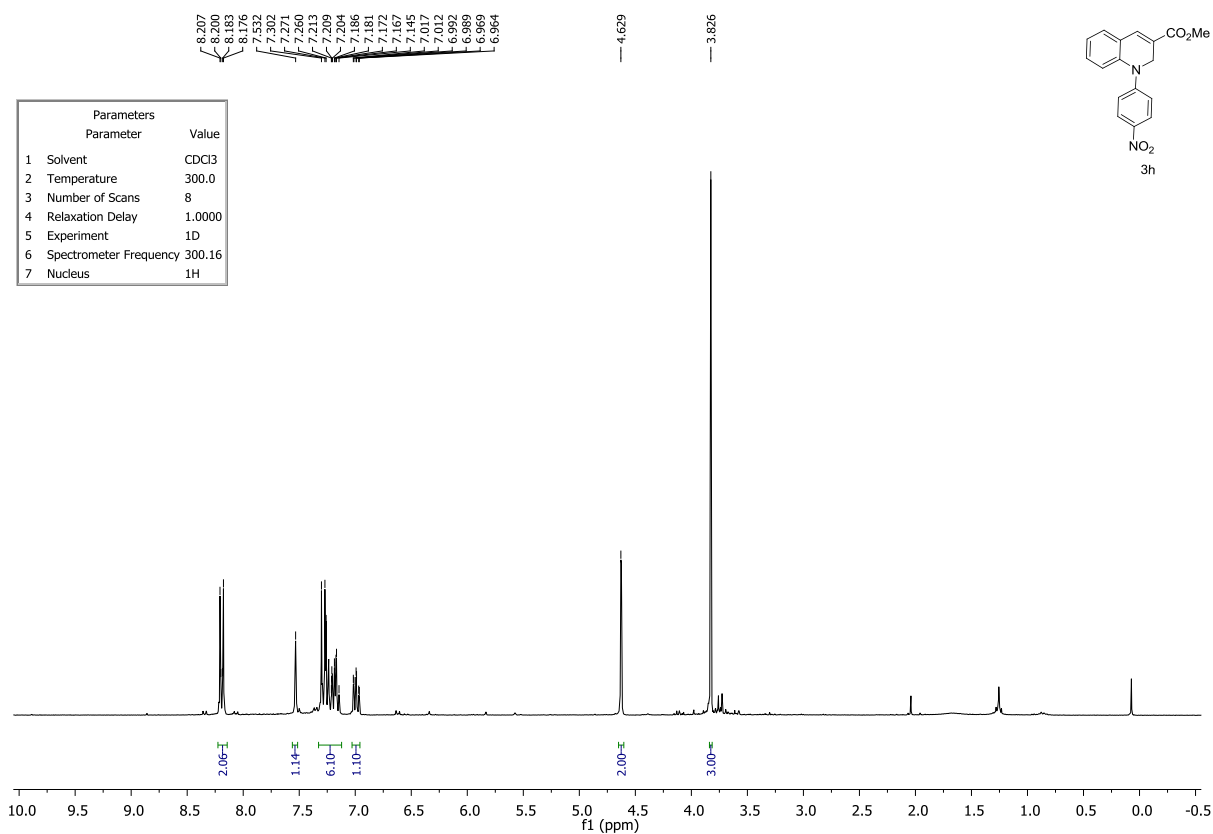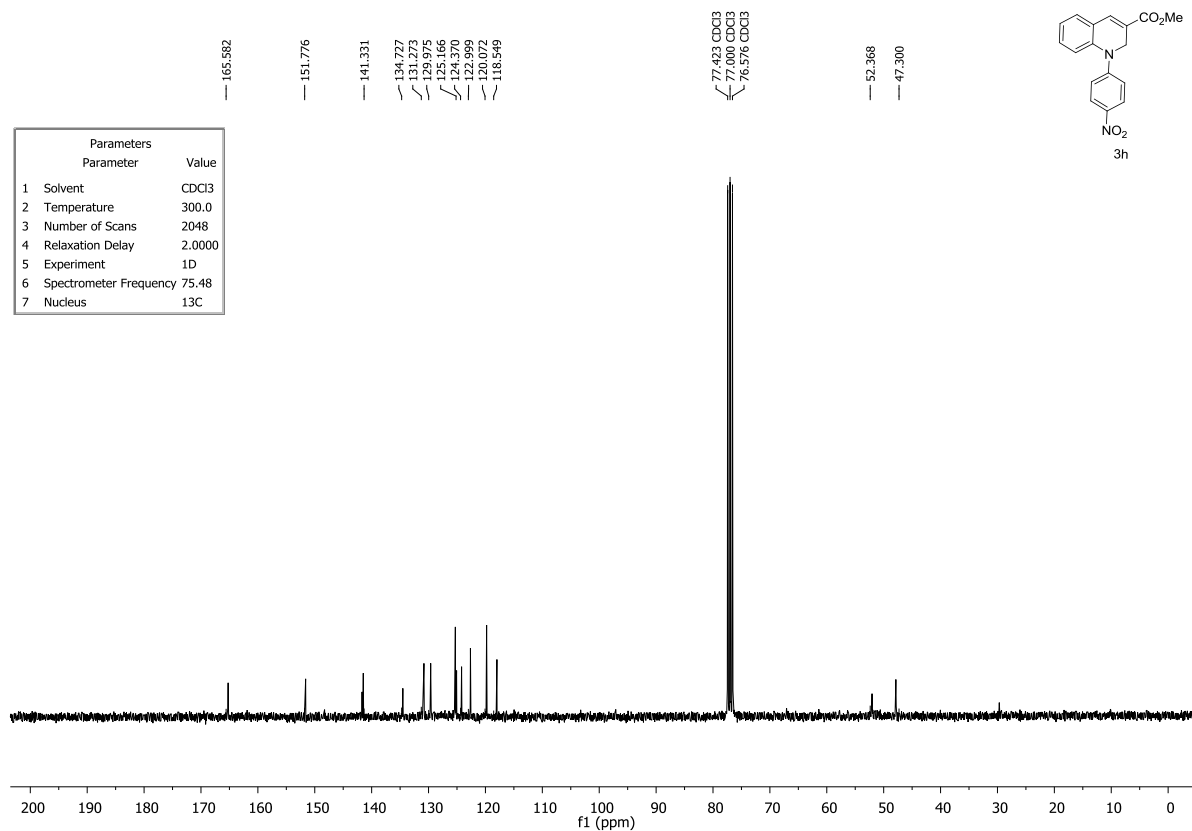

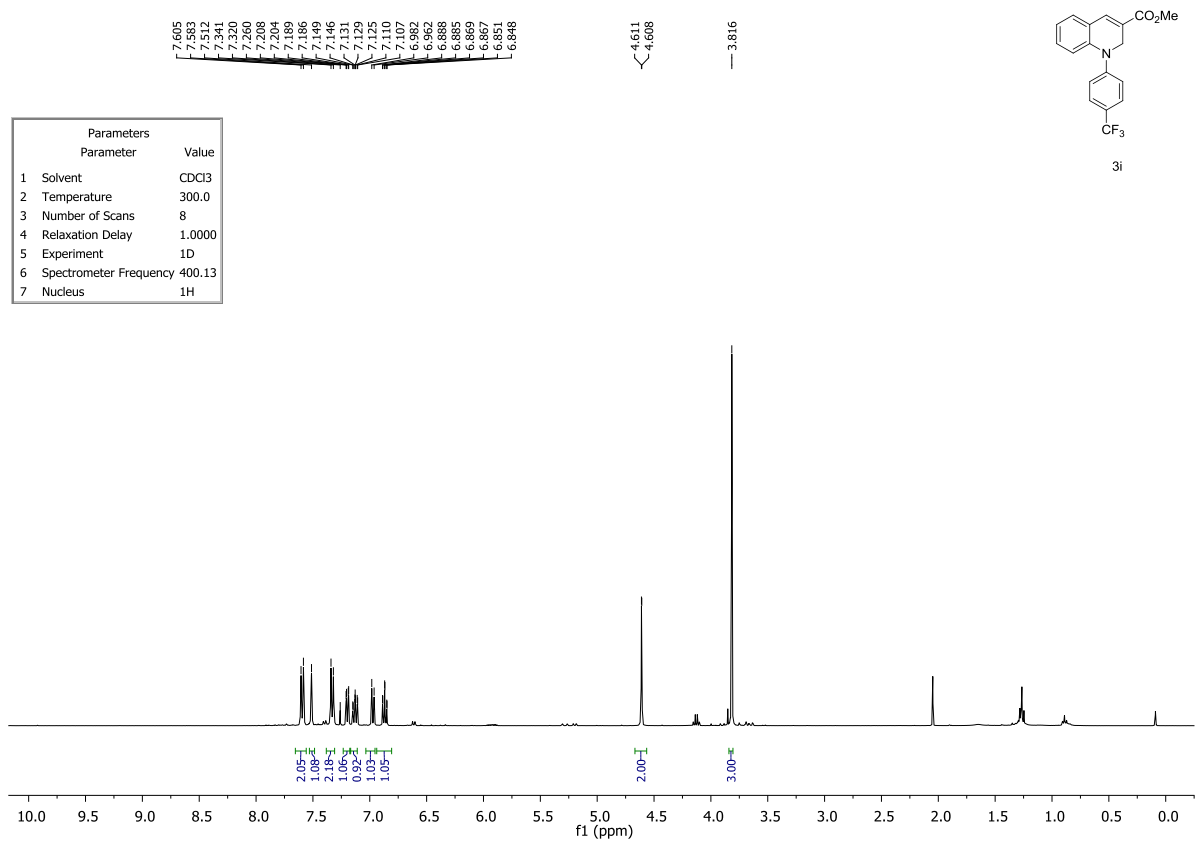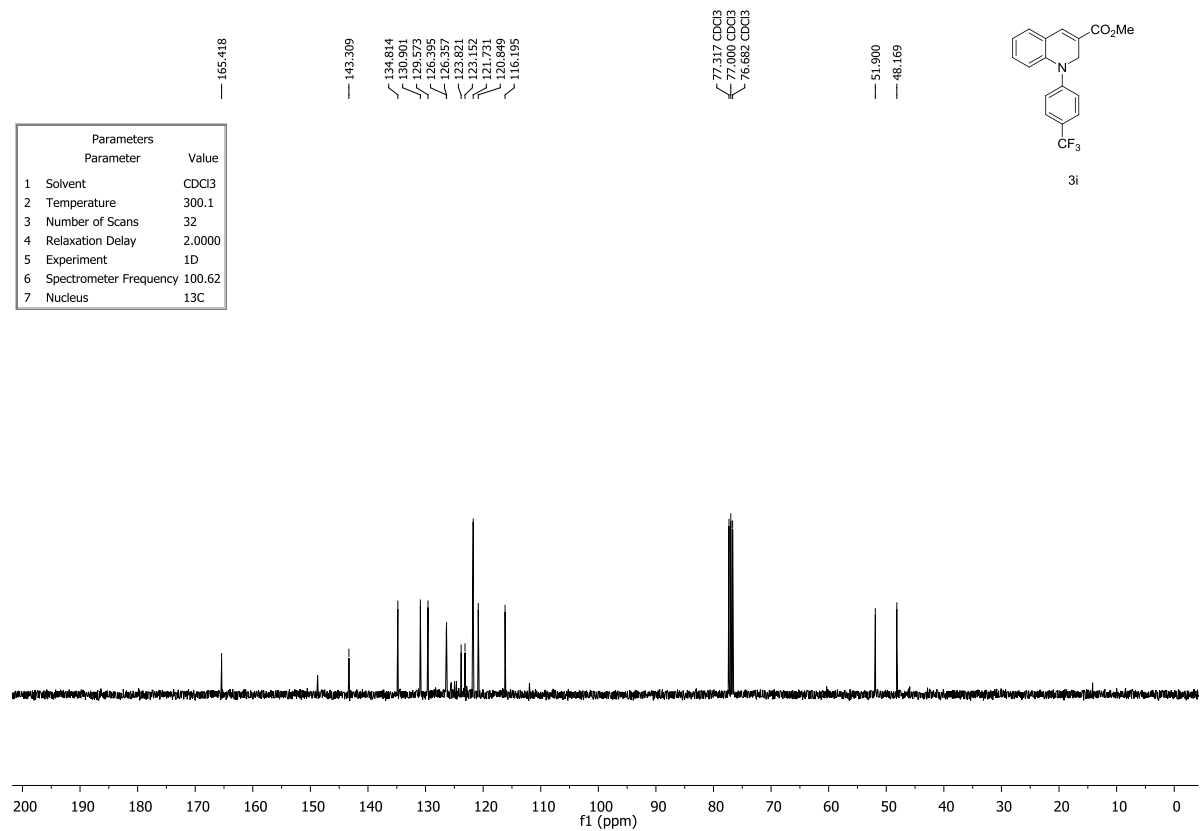

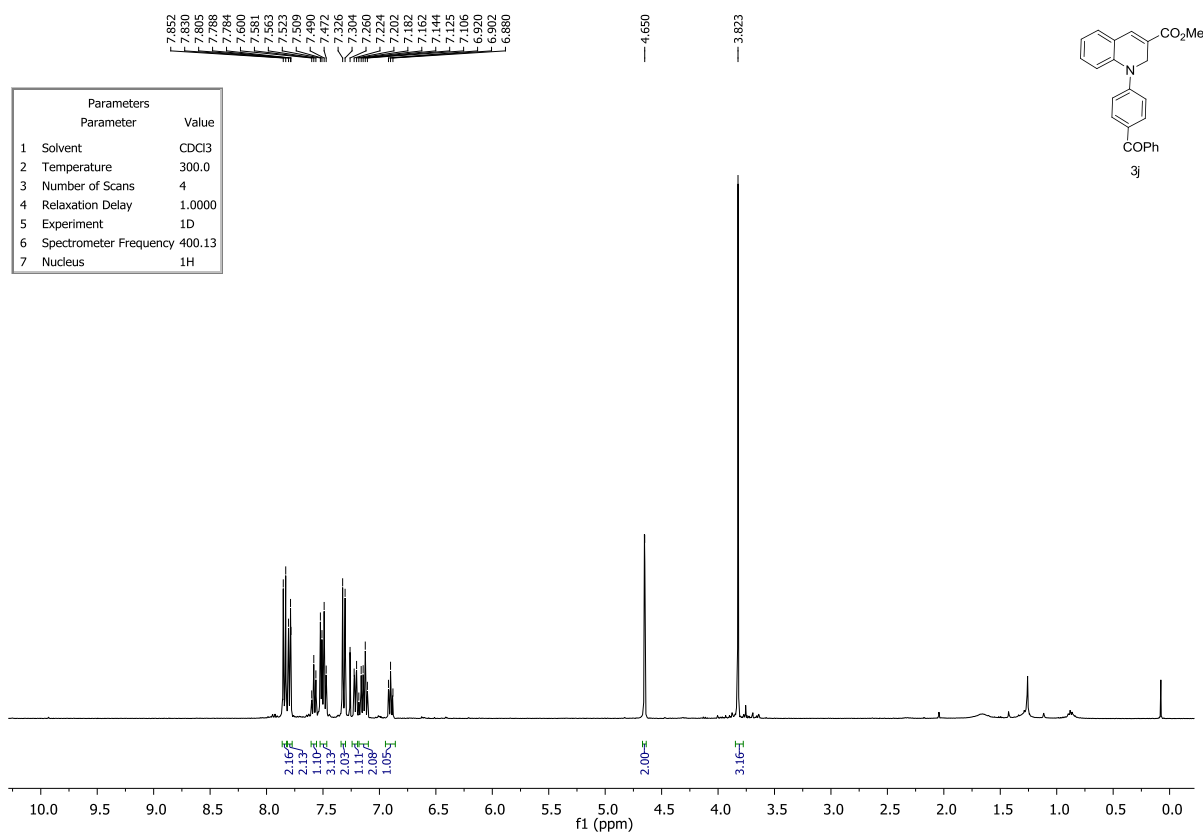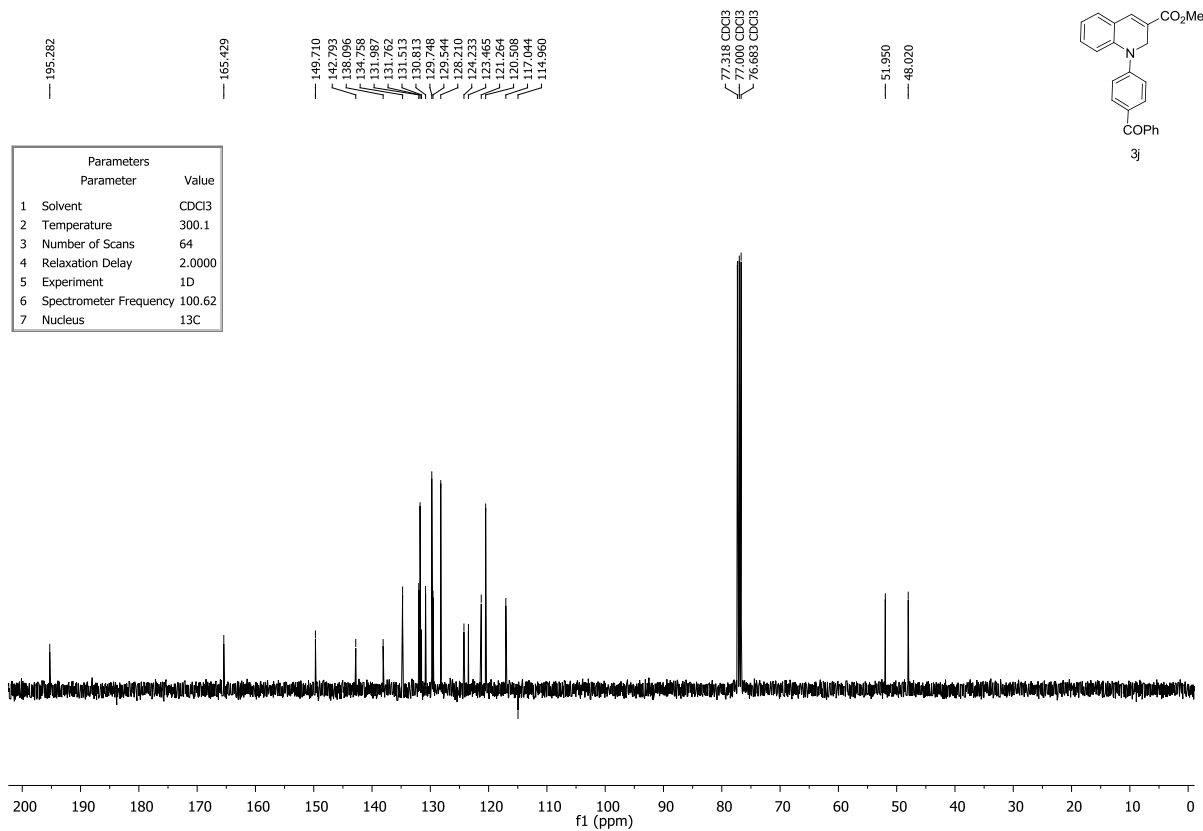

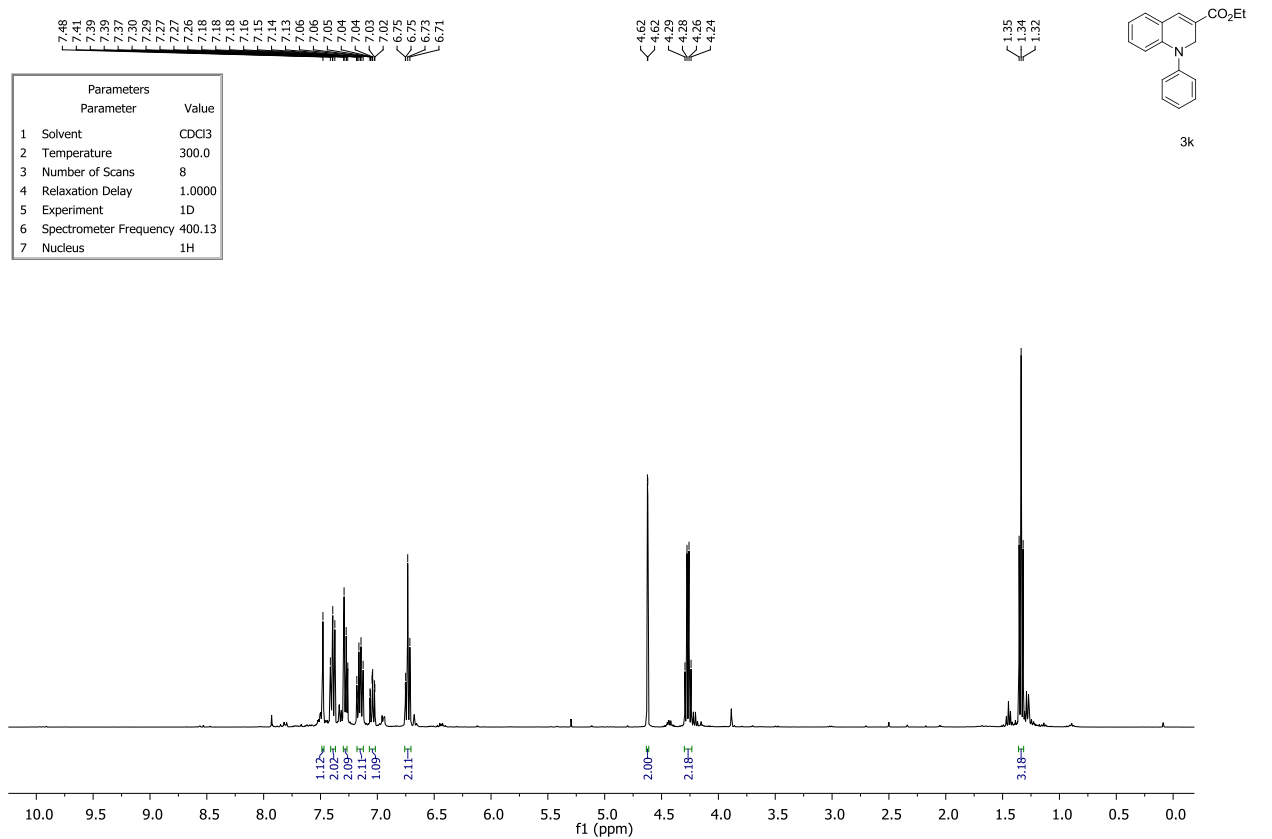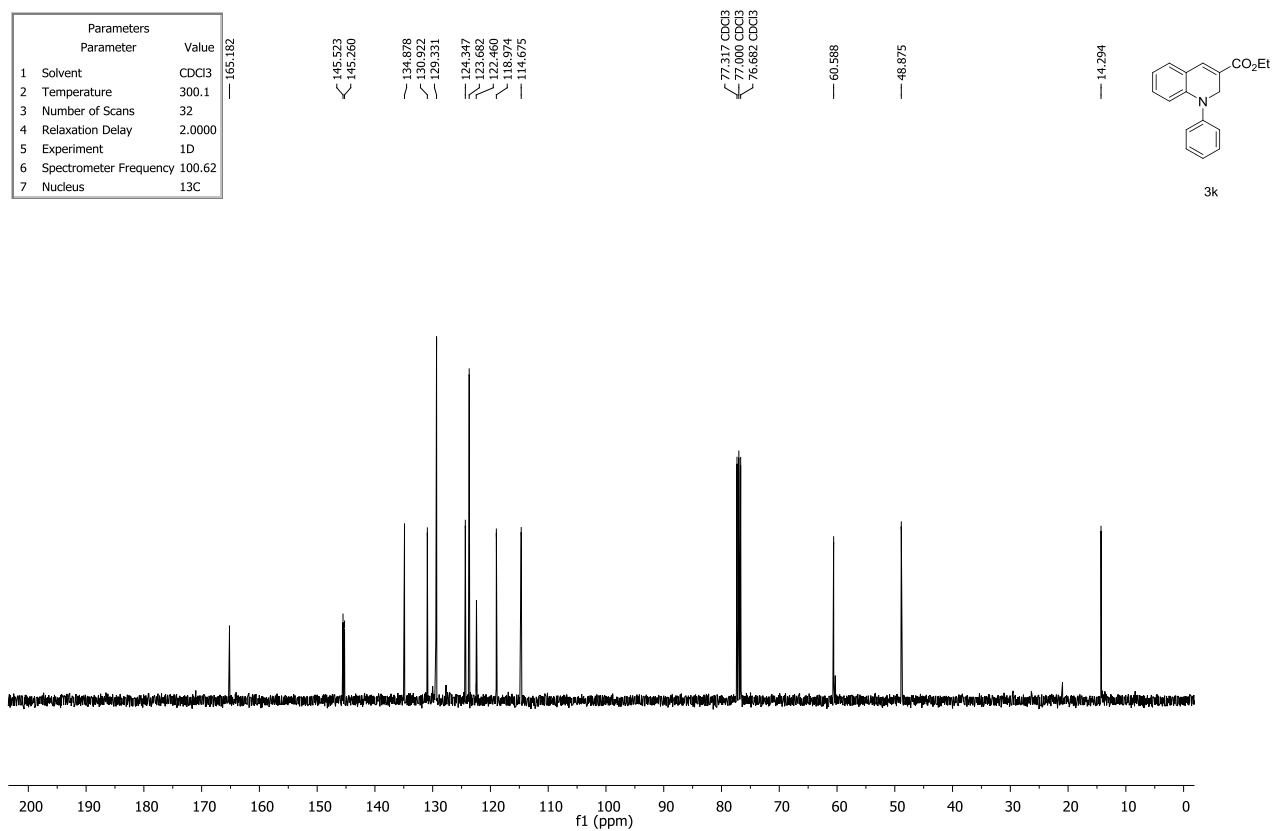

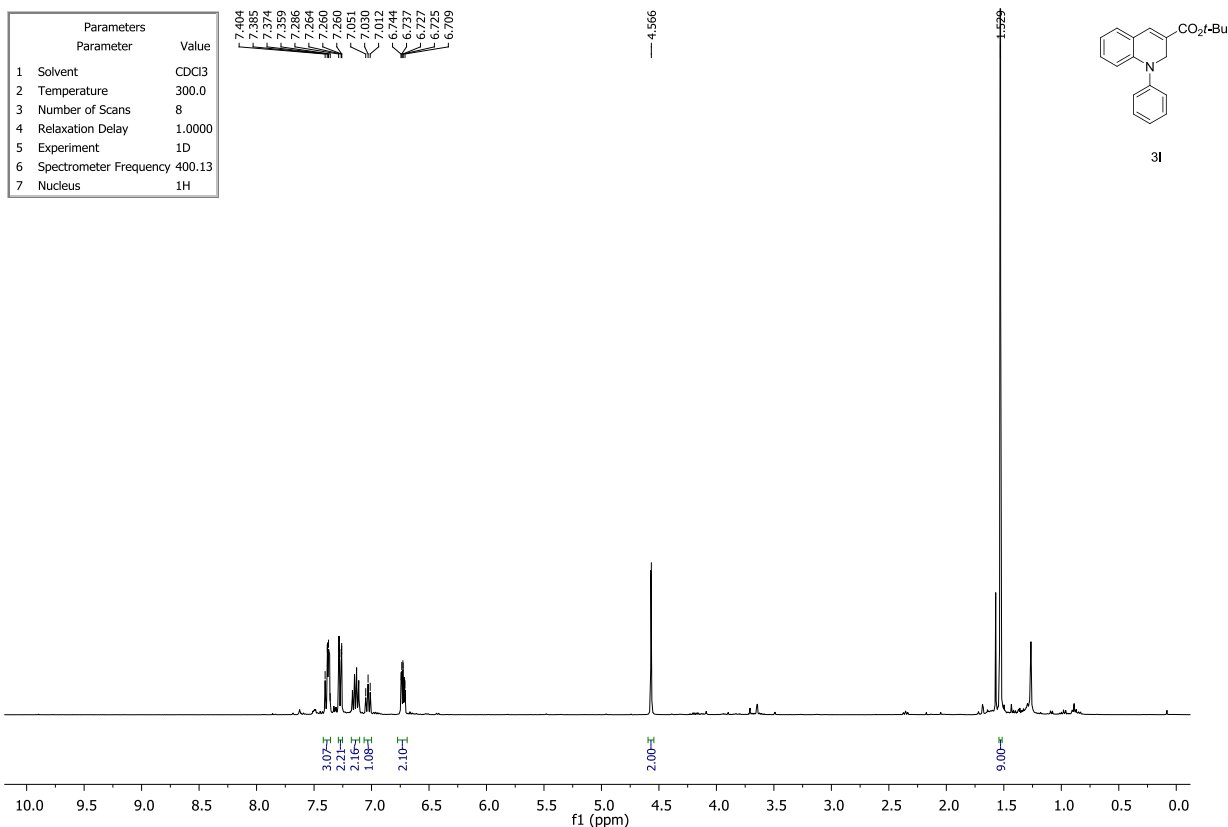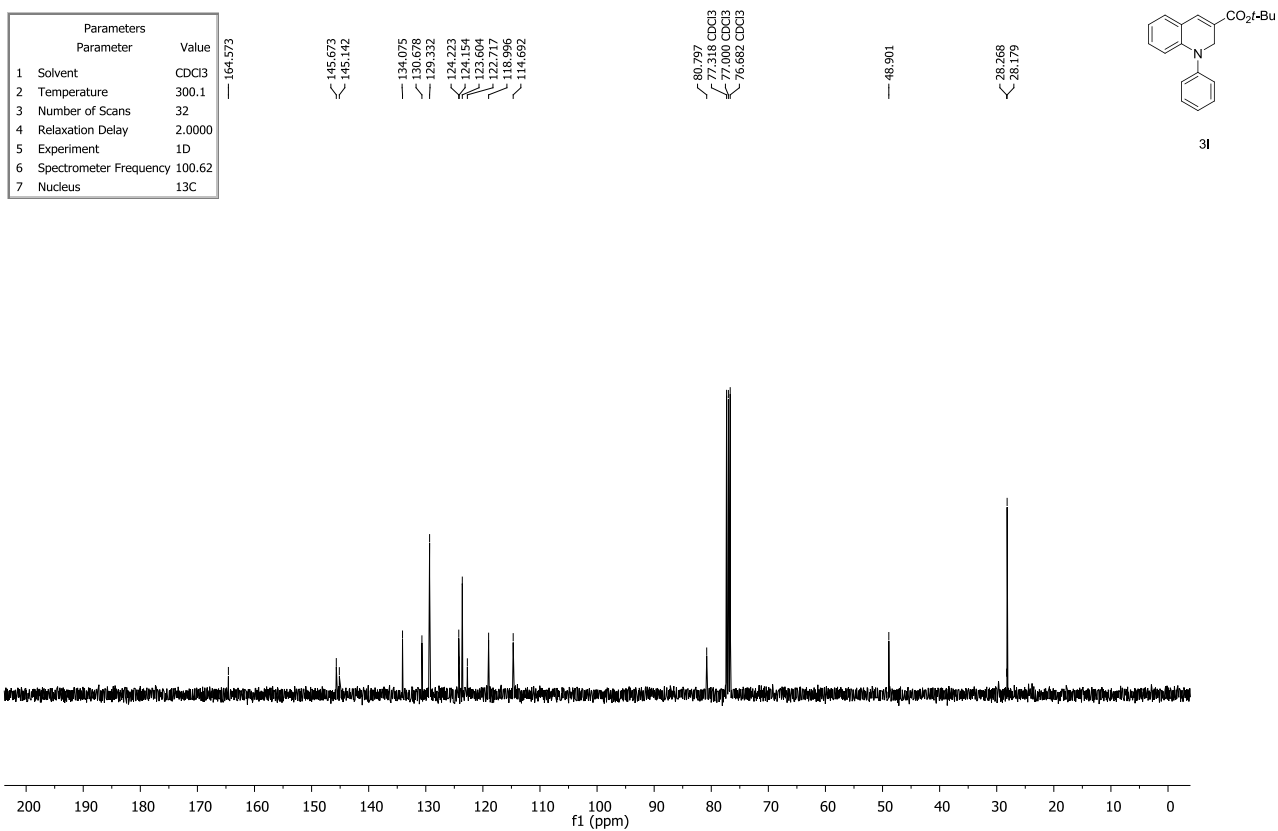

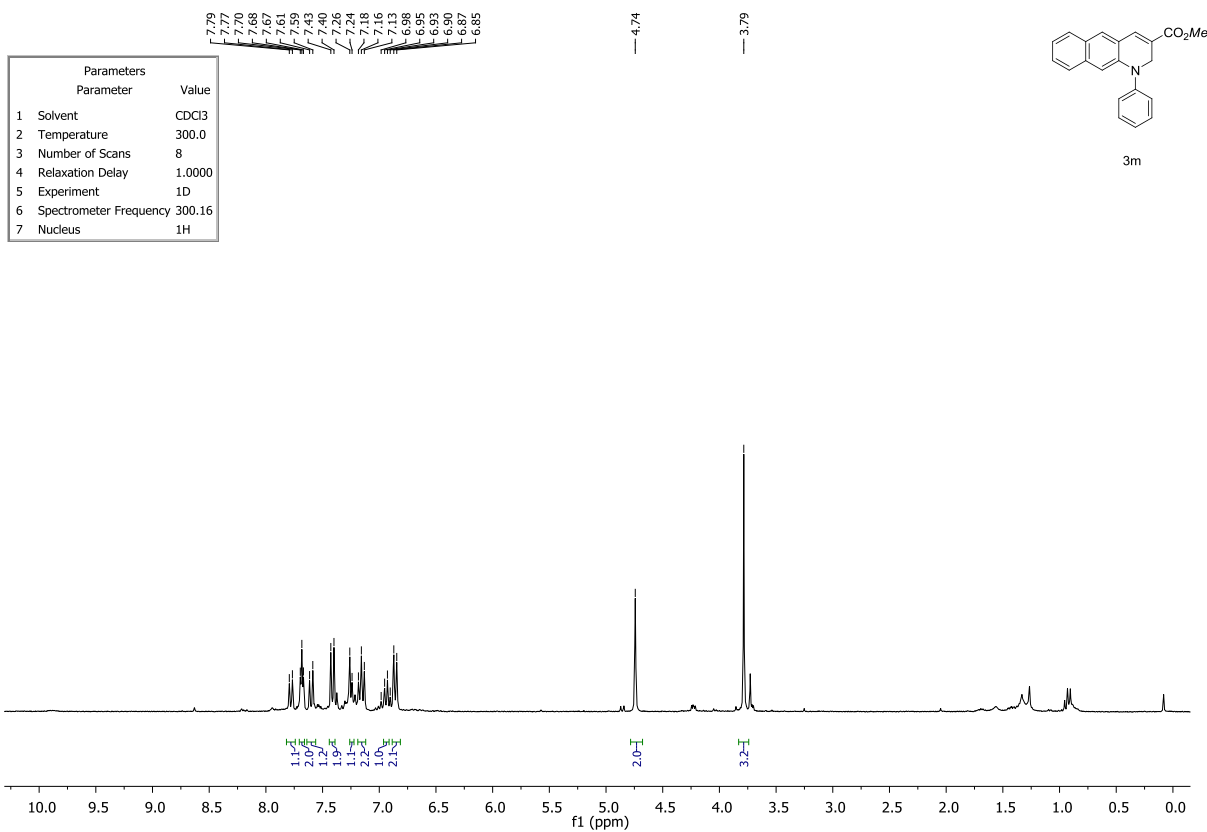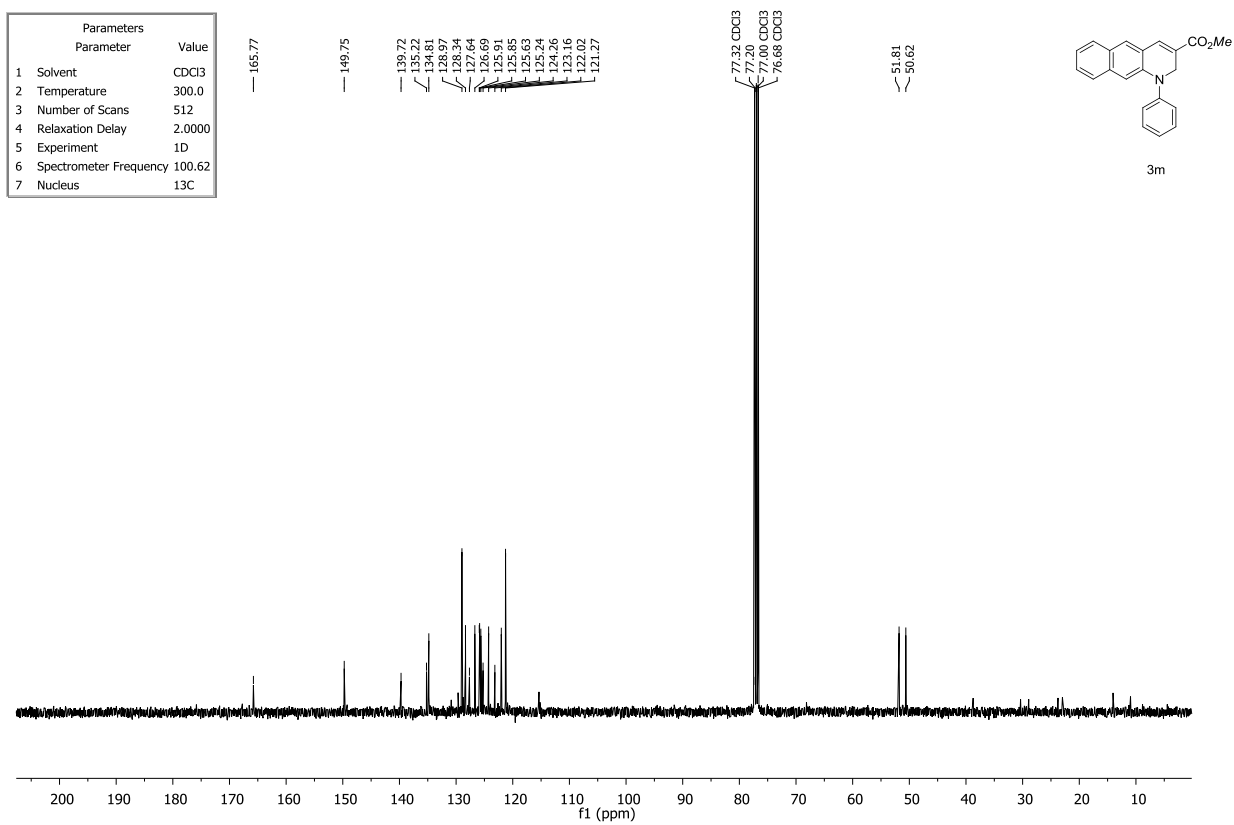

Supplement: Supplementary file 1 [file 4043143]
